# Supplementary material for: HbMYB44, a Rubber Tree MYB Transcription Factor With Versatile Functions in Modulating Multiple Phytohormone Signaling and Abiotic Stress Responses
Source: Front Plant Sci. 2022 Jun 2;13:893896. doi: 10.3389/fpls.2022.893896 (PMC9201644; doi:10.3389/fpls.2022.893896)
Supplement: Supplementary file 1 [file Data_Sheet_1.XLSX]

## Sheet: Sheet1
Supplemental Table 1 The sequences of Arabidopsis and rubber tree MYB proteins used in phylogenetic analyses
MYB transcription factor subfamily	Locus ID	Gene/Protein name	amino acid sequence
R2R3-MYB	At3g27920	AtMYB0	MRIRRRDEKENQEYKKGLWTVEEDNILMDYVLNHGTGQWNRIVRKTGLKRCGKSCRLRWMNYLSPNVNKGNFTEQEEDLIIRLHKLLGNRWSLIAKRVPGRTDNQVKNYWNTHLSKKLVGDYSSAVKTTGEDDDSPPSLFITAATPSSCHHQQENIYENIAKSFNGVVSASYEDKPKQELAQKDVLMATTNDPSHYYGNNALWVHDDDFELSSLVMMNFASGDVEYCL*
R2R3-MYB	At3g09230	AtMYB1	MEAEIVRRSEVTGLRREVEESSIGRGDCDGDGGDVGEDAAGFVGTSGRGRRDRVKGPWSKEEDDVLSELVKRLGARNWSF IARSIPGRSGKSCRLRWCNQLNPNLIRNSFTEVEDQAIIAAHAIHGNKWAVIAKLLPGRTDNAIKNHWNSALRRRFIDFE KAKNIGTGSLVVDDSGFDRTTTVASSEETLSSGGGCHVTTPIVSPEGKEATTSMEMSEEQCVEKTNGEGISRQDDKDPPT LFRPVPRLSSFNACNHMEGSPSPHIQDQNQLQSSKQDAAMLRLLEGAYSERFVPQTCGGGCCSNNPDGSFQQESLLGPEF VDYLDSPTFPSSELAAIATEIGSLAWLRSGLESSSVRVMEDAVGRLRPQGSRGHRDHYLVSEQGTNITNVLST*
R2R3-MYB	At3g12820	AtMYB10	MGNRRAPCCDKSQVKRGPWSDEESERLRSFILKNGHQNWRSLPKLAGLMRCGKSCRLRWINYLRPGLKRGNFTKEEEDTI IHLHQAYGNKWSKIASNFPGRTDNEIKNVWNTHLKKRLVKRSISSSSSDVTNHSVSSTSSSSSSISSVLQDVIIKSERPN QEEEFGEILVEQMACGFEVDAPQSLECLFDDSQVPPPISKPDSLQTHGKSSDHEFWSRLIEPGFDDYNEWLIFLDNQTC*
R2R3-MYB	At2g25230	AtMYB100	MKKNYQKKNIKVVSTSKYLKKSDIDKVNWTESEDIKLKEIMALGPKNKWTKVAKKFEGRTGKQCRERWYNHARPNIKKTA WSEEEDQILIEAHKVLGTKWVEIAQQLPGRSDNNIKNHWNTTKRRVQNKRGGTVNPVGNNILENYIRCITINNEDFLKTD GSYGEPTNIESDDDSKDMLYGEMNLSLETITTQTTKPLTNASTTSPYVQMPEDNYTMEDCESLEDILELLRWWE*
R2R3-MYB	At2g32460	AtMYB101	MDGGGETTATATMEGRGLKKGPWTTTEDAILTEYVRKHGEGNWNAVQKNSGLLRCGKSCRLRWANHLRPNLKKGSFTPDE EKIIIDLHAKLGNKWARMASQLPGRTDNEIKNYWNTRMKRRQRAGLPLYPHEIQHQGIDIDDEFEFDLTSFQFQNQDLDH NHQNMIQYTNSSNTSSSSSSFSSSSSQPSKRLRPDPLVSTNPGLNPIPDSSMDFQMFSLYNNSLENDNNQFGFSVPLSSS SSSNEVCNPNHILEYISENSDTRNTNKKDIDAMSYSSLLMGDLEIRSSSFPLGLDNSVLELPSNQRPTHSFSSSPIIDNG VHLEPPSGNSGLLDALLEESQALSRGGLFKDVRVSSSDLCEVQDKRVKMDFENLLIDHLNSSNHSSLGANPNIHN…
R2R3-MYB	At4g21440	AtMYB102	MARSPCCEKNGLKKGPWTSEEDQKLVDYIQKHGYGNWRTLPKNAGLQRCGKSCRLRWTNYLRPDIKRGRFSFEEEETIIQ LHSFLGNKWSAIAARLPGRTDNEIKNFWNTHIRKKLLRMGIDPVTHSPRLDLLDISSILASSLYNSSSHHMNMSRLMMDT NRRHHQQHPLVNPEILKLATSLFSQNQNQNLVVDHDSRTQEKQTVYSQTGVNQYQTNQYFENTITQELQSSMPPFPNEAR QFNNMDHHFNGFGEQNLVSTSTTSVQDCYNPSFNDYSSSNFVLDPSYSDQSFNFANSVLNTPSSSPSPTTLNSSYINSSS CSTEDEIESYCSNLMKFDIPDFLDVNGFII*
R2R3-MYB	At1g63910	AtMYB103	MGRIPCCEKENVKRGQWTPEEDNKLASYIAQHGTRNWRLIPKNAGLQRCGKSCRLRWTNYLRPDLKHGQFSEAEEHIIVK FHSVLGNRWSLIAAQLPGRTDNDVKNYWNTKLKKKLSGMGIDPVTHKPFSHLMAEITTTLNPPQVSHLAEAALGCFKDEM LHLLTKKRVDLNQINFSNHNPNPNNFHEIADNEAGKIKMDGLDHGNGIMKLWDMGNGFSYGSSSSSFGNEERNDGSASPA VAAWRGHGGIRTAVAETAAAEEEERRKLKGEVVDQEEIGSEGGRGDGMTMMRNHHHHQHVFNVDNVLWDLQADDLINHMV*
R2R3-MYB	At2g26950	AtMYB104	MIQDQANDLLAMKKTFTKSKWKPEEDRILKDYVIQYGDRTWTHVPKRTGLPHNPASCRFRWMNHLKPSLKKGPFTDEEEK RVLQLHAVLGNKWSQMAREFPGRTDNEIKNFWNARRMRLKGKGLPVYPDEVREQAIRTAAQYGVKVELLNAHYSQDSLMA GNVEKPQELNNLALNQCSPYYQSTLANVQPSRNRVMEPETTFPFTGGSAMNEQNPTLLCNPYVESTQEQLPDSHLFGNVT YSSPPMPLIHEVENLELPSFQGFDFHEEPSSFGAEQYNPMLNLEPHNTLVQSPLIGQTPTDFPSSFYDELLDELLESVVN GSLGEIPKTDTSSESQLFQSSLRSHTDATPDIANTTGKPFLVSTHYITITSFFVCSIQEVSTNLYA*
R2R3-MYB	At1g69560	AtMYB105	MEMVHADVASLSITPCFPSSLSSSSHHHYNQQQHCIMSEDQHHSMDQTTSSDYFSLNIDNAQHLRSYYTSHREEDMNPNL SDYSNCNKKDTTVYRSCGHSSKASVSRGHWRPAEDTKLKELVAVYGPQNWNLIAEKLQGRSGKSCRLRWFNQLDPRINRR AFTEEEEERLMQAHRLYGNKWAMIARLFPGRTDNSVKNHWHVIMARKFREQSSSYRRRKTMVSLKPLINPNPHIFNDFDP TRLALTHLASSDHKQLMLPVPCFPGYDHENESPLMVDMFETQMMVGDYIAWTQEATTFDFLNQTGKSEIFERINEEKKPP FFDFLGLGTV*
R2R3-MYB	At3g01140	AtMYB106	MPIHVRDREKGRLQNLNRDIFCCVSPSIYQSDAKRAAFVIILIMIISPCCDKAGLKKGPWTPEEDQKLLAYIEEHGHGSW RSLPEKAGLQRCGKSCRLRWTNYLRPDIKRGKFTVQEEQTIIQLHALLGNRWSAIATHLPKRTDNEIKNYWNTHLKKRLI KMGIDPVTHKHKNETLSSSTGQSKNAATLSHMAQWESARLEAEARLARESKLLHLQHYQNNNNLNKSAAPQQHCFTQKTS TNWTKPNQGNGDQQLESPTSTVTFSENLLMPLGIPTDSSRNRNNNNNESSAMIELAVSSSTSSDVSLVKEHEHDWIRQIN CGSGGIGEGFTSLLIGDSVGRGLPTGKNEATAGVGNESEYNYYEDNKNYWNSILNLVDSSPSDSATMF*
R2R3-MYB	At3g02940	AtMYB107	MGRSPCCDESGLKKGPWTPEEDQKLINHIRKHGHGSWRALPKQAGLNRCGKSCRLRWTNYLRPDIKRGNFTAEEEQTIIN LHSLLGNKWSSIAGHLPGRTDNEIKNYWNTHIRKKLIQMGIDPVTHRPRTDHLNVLAALPQLLAAANFNNLLNLNQNIQL DATSVAKAQLLHSMIQVLSNNNTSSSFDIHHTTNNLFGQSSFLENLPNIENPYDQTQGLSHIDDQPLDSFSSPIRVVAYQ HDQNFIPPLISTSPDESKETQMMVKNKEIMKYNDHTSNPSSTSTFTQDHQPWCDIIDDEASDSYWKEIIEQTCSEPWPFR E*
R2R3-MYB	At3g06490	AtMYB108	MDEKGRSLKNNNMEDEMDLKRGPWTAEEDFKLMNYIATNGEGRWNSLSRCAGLQRTGKSCRLRWLNYLRPDVRRGNITLE EQLLILELHSRWGNRWSKIAQYLPGRTDNEIKNYWRTRVQKHAKQLKCDVNSQQFKDTMKYLWMPRLVERIQSASASSAA AATTTTTTTTGSAGTSSCITTSNNQFMNYDYNNNNMGQQFGVMSNNDYITPENSSVAVSPASDLTEYYSAPNPNPEYYSG QMGNSYYPDQNLVSSQLLPDNYFDYSGLLDEDLTAMQEQSNLSWFENINGAASSSDSLWNIGETDEEFWFLQQQQQFNNN GSF*
R2R3-MYB	At3g55730	AtMYB109	MEGETHQSEPLPLASGDSDEGISAAIEAELAELAAGDSSGGGGCGGGGGGIRSKVKGPWSTEEDAVLTKLVRKLGPRNWS LIARGIPGRSGKSCRLRWCNQLDPCLKRKPFSDEEDRMIISAHAVHGNKWAVIAKLLTGRTDNAIKNHWNSTLRRKYADL WNNGQWMANSVTTASVKNENVDETTNPPSSKQQLPQGDINSSPPKPPQVSDVVMEEAANEPQEPQEQQEQAPPVVSNVPT ENNVFRPVARVGAFSIYNPTSQKNGYRDYNIVPCEGPLIQAAKPDSLAGKFLQSLCDEPQIPSKCGHGCSTLPAETKFSR NSVLGPEFVDYEEPSAVFNQELISIATDLNNIAWIKSGLDNAVVREAEQSLKMDNYNYNDPRIKFTGMMPRQDFF…
R2R3-MYB	At3g62610	AtMYB11	MGRAPCCEKVGIKKGRWTAEEDRTLSDYIQSNGEGSWRSLPKNAGLKRCGKSCRLRWINYLRSDIKRGNITPEEEDVIVK LHSTLGTRWSTIASNLPGRTDNEIKNYWNSHLSRKLHGYFRKPTVANTVENAPPPPKRRPGRTSRSAMKPKFILNPKNHK TPNSFKANKSDIVLPTTTIENGEGDKEDALMVLSSSSLSGAEEPGLGPCGYGDDGDCNPSINGDDGALCLNDDIFDSCFL LDDSHAVHVSSCESNNVKNSEPYGGMSVGHKNIETMADDFVDWDFVWREGQTLWDEKEDLDSVLSRLLDGEEMESEIRQR DSNDFGEPLDIDEENKMAAWLLS*
R2R3-MYB	At3g29020	AtMYB110	MDFSCFQEYPFEFHCRGTTFNGFRENNAVSETVEEFCNKRRMQKKSDDLKTKKKKKQSVSRVCSRGHWRISEDTQLMELV SVYGPQNWNHIAESMQGRTGKSCRLRWFNQLDPRINKRAFSDEEEERLLAAHRAFGNKWAMIAKLFNGRTDNALKNHWHV LMARKMRQQSSSYVQRFNGSAHESNTDHKIFNLSPGLSLLTLHICIEFNSVIVMRYFRYLSLRNNELMVWSQK*
R2R3-MYB	At5g49330	AtMYB111	MMQEEGNRKGPWTEQEDILLVNFVHLFGDRRWDFIAKVSGLNRTGKSCRLRWVNYLHPGLKRGKMTPQEERLVLELHAKW GNRWSKIARKLPGRTDNEIKNYWRTHMRKKAQEKKRPVSPTSSFSNCSSSSVTTTTTNTQDTSCHSRKSSGEVSFYDTGG SRSTREMNQENEDVYSLDDIWREIDHSAVNIIKPVKDIYSEQSHCLSYPNLASPSWESSLDSIWNMDADKSKISSYFAND QFPFCFQHSRSPWSSG*
R2R3-MYB	At1g48000	AtMYB112	MNISRTEFANCKTLINHKEEVEEVEKKMEIEIRRGPWTVEEDMKLVSYISLHGEGRWNSLSRSAGLNRTGKSCRLRWLNY LRPDIRRGDISLQEQFIILELHSRWGNRWSKIAQHLPGRTDNEIKNYWRTRVQKHAKLLKCDVNSKQFKDTIKHLWMPRL IERIAATQSVQFTSNHYSPENSSVATATSSTSSSEAVRSSFYGGDQVEFGTLDHMTNGGYWFNGGDTFETLCSFDELNKW LIQ*
R2R3-MYB	At1g66370	AtMYB113	MGESPKGLRKGTWTTEEDILLRQCIDKYGEGKWHRVPLRTGLNRCRKSCRLRWLNYLKPSIKRGKLCSDEVDLVLRLHKL LGNRWSLIAGRLPGRTANDVKNYWNTHLSKKHDERCCKTKMINKNITSHPTSSAQKIDVLKPRPRSFSDKNSCNDVNILP KVDVVPLHLGLNNNYVCESSITCNKDEQKDKLININLLDGDNMWWESLLEADVLGPEATETAKGVTLPLDFEQIWARFDE ETLELN*
R2R3-MYB	At1g66380	AtMYB114	MEGSSKGLRKGAWTAEEDSLLRQCIGKYGEGKWHQVPLRAGLNRCRKSCRLRWLNYLKPSIKRGKFSSDEVDLLLRLHKL LGNRWSLIAGRLPGRTANDVKNYWNTHLSKKHEPCCKTKIKRINIITPPNTPAQKVDIF*
R2R3-MYB	At5g40360	AtMYB115	MYHQNLISSTPNQNSNPHDWDIQNPLFSIHPSAEIPSKYPFMGITSCPNTNVFEEFQYKITNDQNFPTTYNTPFPVISEG ISYNMHDVQENTMCGYTAHNQGLIIGCHEPVLVHAVVESQQFNVPQSEDINLVSQSERVTEDKVMFKTDHKKKDIIGKGQ WTPTEDELLVRMVKSKGTKNWTSIAKMFQGRVGKQCRERWHNHLRPNIKKNDWSEEEDQILIEVHKIVGNKWTEIAKRLP GRSENIVKNHWNATKRRLHSVRTKRSDAFSPRNNALENYIRSITINNNALMNREVDSITANSEIDSTRCENIVDEVMNLN LHATTSVYVPEQAVLTWGYDFTKCYEPMDDTWMLMNGWN*
R2R3-MYB	At1g25340	AtMYB116	MSNITKKKCNGNEEGAEQRKGPWTLEEDTLLTNYISHNGEGRWNLLAKSSGLKRAGKSCRLRWLNYLKPDIKRGNLTPQE QLLILELHSKWGNRWSKISKYLPGRTDNDIKNYWRTRVQKQARQLNIDSNSHKFIEVVRSFWFPRLINEIKDNSYTNNIK ANAPDLLGPILRDSKDLGFNNMDCSTSMSEDLKKTSQFMDFSDLETTMSLEGSRGGSSQCVSEVYSSFPCLEEEYMVAVM GSSDISALHDCHVADSKYEDDVTQDLMWNMDDIWQFNEYAHFN*
R2R3-MYB	At1g26780	AtMYB117	MFITEKQVWMDEIVARRASSSWDFPFNDINIHQHHHRHCNTSHEFEILKSPLGDVAVHEEESNNNNPNFSNSESGKKETT DSGQSWSSSSSKPSVLGRGHWRPAEDVKLKELVSIYGPQNWNLIAEKLQGRSGKSCRLRWFNQLDPRINRRAFTEEEEER LMQAHRLYGNKWAMIARLFPGRTDNSVKNHWHVVMARKYREHSSAYRRRKLMSNNPLKPHLTNNHHPNPNPNYHSFISTN HYFAQPFPEFNLTHHLVNNAPITSDHNQLVLPFHCFQGSL*
R2R3-MYB	At3g27780	AtMYB118	MEFESVFKMHYPYLAAVIYDDSSTLKDFHPSLTDDFSCVHNVHHKPSMPHTYEIPSKETIRGITPSPCTEAFEACFHGTS NDHVFFGMAYTTPPTIEPNVSHVSHDNTMWENDQNQGFIFGTESTLNQAMADSNQFNMPKPLLSANEDTIMNRRQNNQVM IKTEQIKKKNKRFQMRRICKPTKKASIIKGQWTPEEDKLLVQLVDLHGTKKWSQIAKMLQGRVGKQCRERWHNHLRPDIK KDGWTEEEDIILIKAHKEIGNRWAEIARKLPGRTENTIKNHWNATKRRQHSRRTKGKDEISLSLGSNTLQNYIRSVTYND DPFMTANANANIGPRNMRGKGKNVMVAVSEYDEGECKYIVDGVNNLGLEDGRIKMPSLAAMSASGSASTSGSASG…
R2R3-MYB	At5g58850	AtMYB119	MEDRRLVHGAAPPLTAVERFLYGQKNDALCSKKQESSRDQPIVKTKISIETRSDNKENTTFGPTREKHLVLNGGNRNPTG EVVARSAARDYQNSTKKRSSKNLIKGQWTAEEDRKLIRLVRQHGERKWAMISEKLEGRAGKQCRERWHNHLRPDIKKDGW SEEEERVLVESHMRIGNKWAEIAKLIPGRTENSIKNHWNATKRRQNSKRKHKRESNADNNDRDASPSAKRPCILQDYIKS IERNNINKDNDEKKNENTISVISTPNLDQIYSDGDSASSILGGPYDEELDYFQNIFANHPISLENLGLSQTSDEVTQSSS SGFMIKNPNPNLHDSVGIHHQEATITAPANTPHLASDIYLSYLLNGTTSSYSDTHFPSSSSSTSSTTVEHGGHNE…
R2R3-MYB	At2g47460	AtMYB12	MGRAPCCEKVGIKRGRWTAEEDQILSNYIQSNGEGSWRSLPKNAGLKRCGKSCRLRWINYLRSDLKRGNITPEEEELVVK LHSTLGNRWSLIAGHLPGRTDNEIKNYWNSHLSRKLHNFIRKPSISQDVSAVIMTNASSAPPPPQAKRRLGRTSRSAMKP KIHRTKTRKTKKTSAPPEPNADVAGADKEALMVESSGAEAELGRPCDYYGDDCNKNLMSINGDNGVLTFDDDIIDLLLDE SDPGHLYTNTTCGGDGELHNIRDSEGARGFSDTWNQGNLDCLLQSCPSVESFLNYDHQVNDASTDEFIDWDCVWQEGSDN NLWHEKENPDSMVSWLLDGDDEATIGNSNCENFGEPLDHDDESALVAWLLS*
R2R3-MYB	At5g55020	AtMYB120	MIMYGGGGAGKDGGSTNHLSDGGVILKKGPWTAAEDEILAAYVRENGEGNWNAVQKNTGLARCGKSCRLRWANHLRPNLK KGSFTGDEERLIIQLHAQLGNKWARMAAQLPGRTDNEIKNYWNTRLKRLLRQGLPLYPPDIIPNHQLHPHPHHQQQQQHN HHHHHHQQQQQHQQMYFQPQSSQRNTPSSSPLPSPTPANAKSSSSFTFHTTTANLLHPLSPHTPNTPSQLSSTPPPPPLS SPLCSPRNNQYPTLPLFALPRSQINNNNNGNFTFPRPPPLLQPPSSLFAKRYNNANTPLNCINRVSTAPFSPVSRDSYTS FLTLPYPSPTAQTATYHNTNNPYSSSPSFSLNPSSSSYPTSTSSPSFLHSHYTPSSTSFHTNPVYSMKQEQLPSN…
R2R3-MYB	At3g30210	AtMYB121	MLDWGVQGHHQKHDHDIYQQQHQQQGCRKGPWTLEEDKLLAEYVTSHGEGRWSTVAKCAGLNRSGKSCRLRWVNYLRPGL KRGQITPQEEGIILELHSLWGNKWSTIARYLPGRTDNEIKNYWRTHYKKNQKSSSKQDKVKKSLSRKQQQVDLKPQPQAQ SENHQSQLVSQDHMNIDNDHNIASSLYYPTSVFDDKLYMPQSVATTSSDHSMIDEGHLWGSLWNLDEDDPHSFGGGSGQG TAADIDEKFPDSGIEAPSCGSGDYSYTGVYMGGYIF*
R2R3-MYB	At1g74080	AtMYB122	MVRTPCCRAEGLKKGAWTQEEDQKLIAYVQRHGEGGWRTLPDKAGLKRCGKSCRLRWANYLRPDIKRGEFSQDEEDSIIN LHAIHGNKWSAIARKIPRRTDNEIKNHWNTHIKKCLVKKGIDPLTHKSLLDGAGKSSDHSAHPEKSSVHDDKDDQNSNNK KLSGSSSARFLNRVANRFGHRINHNVLSDIIGSNGLLTSHTTPTTSVSEGERSTSSSSTHTSSNLPINRSITVDATSLSS STFSDSPDPCLYEEIVGDIEDMTRFSSRCLSHVLSHEDLLMSVESCLENTSFMREITMIFQEDKIETTSFNDSYVTPINE VDDSCEGIDNYFG*
R2R3-MYB	At5g35550	AtMYB123	MKTRSLEITSPLTAKANGALSLTKLVLISLSTDPSLYLLRTIIVLAHIKGLKRCGKSCRLRWKNYLRPGI KRGNISSDEEELIIRLHNLLGNRWSLIAGRLPGRTDNEIKNHWNSNLRKRLPKTQTKQPKRIKHSTNNEN NVCVIRTKAIRCSKTLLFSDLSLQKKSSTSPLPLKEQEMDQGGSSLMGDLEFDFDRIHSEFHFPDLMDFD GLDCGNVTSLVSSNEILGELVPAQGNLDLNRPFTSCHHRGDDEDWLRDFTC
R2R3-MYB	At1g14350	AtMYB124	MELKSKNFPGFCFEIRRWIFVCRWYTYLNSDFKRGGWSPEEDMLLCEAQRVFGNRWTEIAKVVSGRTDNA VKNRFTTLCKKRAKHEAMTKDSNSNTKRMLFLDGISTPRKSENETPIAKKLKRSHILDLTEISNYGRAEA CVNQQIRSPFSVLARNATGIDSLEEQNQTSNVNESDGEGMFLKKDDPKVTALMQQAELLSSLAQKVNADN TEQSMENAWKVLQDFLNKGKENDLFRYGIPDIDFKIEEFKDLIEDLRSGYEDNQLSWRQPDLHDSPASSE YSSGSTIMVDQSGDKTQPFSADTQTEHKQVGEELLVPKNPDENMPISGEEKFSSPIQVTPLFRSLADGIP SPQFSESERSFLLKTLGIESSSPCPSANPSKPPPCKRVLLHSL
R2R3-MYB	At3g60460	AtMYB125	MRKMEAKKEEIKKGPWKAEEDEVLINHVKRYGPRDWSSIRSKGLLQRTGKSCRLRWVNKLRPNLKNGCKF SADEERTVIELQSEFGNKWARIATYLPGRTDNDVKNFWSSRQKRLARILHNSSDASSSSFNPKSSSSHRL KGKNVKPIRQSSQGFGLVEEEVTVSSSCSQMVPYSSDQVGDEVLRLPDLGVKLEHQPFAFGTDLVLAEYS DSQNDANQQAISPFSPESRELLARLDDPFYYDILGPADSSEPLFALPQPFFEPSPVPRRCRHVSKDEEAD VFLDDFPADMFDQVDPIPSP
R2R3-MYB	At1g06180	AtMYB13	MGRRPCCEKIGLKKGPWSAEEDRILINYISLHGHPNWRALPKLAGLLRCGKSCRLRWINYLRPDIKRGNFTPHEEDTIIS LHQLLGNRWSAIAAKLPGRTDNEIKNVWHTHLKKRLHHSQDQNNKEDFVSTTAAEMPTSPQQQSSSSADISAITTLGNNN DISNSNKDSATSSEDVLAIIDESFWSEVVLMDCDISGNEKNEKKIENWEGSLDRNDKGYNHDMEFWFDHLTSSSCIIGEM SDISEF*
R2R3-MYB	At2g31180	AtMYB14	MGRAPCCEKMGVKRGPWTPEEDQILINYIHLYGHSNWRALPKHAGLLRCGKSCRLRWINYLRPDIKRGNFTPQEEQTIIN LHESLGNRWSAIAAKLPGRTDNEIKNVWHTHLKKRLSKNLNNGGDTKDVNGINETTNEDKGSVIVDTASLQQFSNSITTF DISNDNKDDIMSYEDISALIDDSFWSDVISVDNSNKNEKKIEDWEGLIDRNSKKCSYSNSKLYNDDMEFWFDVFTSNRRI EEFSDIPEF*
R2R3-MYB	At3g23250	AtMYB15	MGRAPCCEKMGLKRGPWTPEEDQILVSFILNHGHSNWRALPKQAGLLRCGKSCRLRWMNYLKPDIKRGNFTKEEEDAIIS LHQILGNRWSAIAAKLPGRTDNEIKNVWHTHLKKRLEDYQPAKPKTSNKKKGTKPKSESVITSSNSTRSESELADSSNPS GESLFSTSPSTSEVSSMTLISHDGYSNEINMDNKPGDISTIDQECVSFETFGADIDESFWKETLYSQDEHNYVSNDLEVA GLVEIQQEFQNLGSANNEMIFDSEMDFWFDVLARTGGEQDLLAGL*
R2R3-MYB	At5g15310	AtMYB16	MILFLFVYRWSAIATHLPKRTDNEIKNYWNTHLKKRLVKMGIDPVTHKPKNETPLSSLGLSKNAAILSHT AQWESARLEAEARLARESKLLHLQHYQTKTSSQPHHHHGFTHKSLLPNWTTKPHEDQQQLESPTSTVSFS EMKESIPAKIEFVGSSTGVTLMKEPEHDWINSTMHEFETTQMGEGIEEGFTGLLLGGDSIDRSFSGDKNE TAGESSGGDCNYYEDNKNYLDSIFNFVDPSPSDSPMF
R2R3-MYB	At3g61250	AtMYB17	MGRTPCCDKIGLKKGPWTPEEDEVLVAHIKKNGHGSWRTLPKLAGLLRCGKSCRLRWTNYLRPDIKRGPFTADEEKLVIQ LHAILGNRWAAIAAQLPGRTDNEIKNLWNTHLKKRLLSMGLDPRTHEPLPSYGLAKQAPSSPTTRHMAQWESARVEAEAR LSRESMLFSPSFYSGVVKTECDHFLRIWNSEIGEAFRNLAPLDESTITSQSPCSRATSTSSALLKSSTNSWGGKEVTVAI HGSDYSPYSNDLEDDSTDSALQLLLDFPISDDDMSFLEENIDSYSQAPPIGLVSMVSKF*
R2R3-MYB	At4g25560	AtMYB18	MAKTKYGERHRKGLWSPEEDEKLRSFILSYGHSCWTTVPIKAGLQRNGKSCRLRWINYLRPGLKRDMISAEEEETILTFH SSLGNKWSQIAKFLPGRTDNEIKNYWHSHLKKKWLKSQSLQDAKSISPPSSSSSSLVACGKRNPETLISNHVFSFQRLLE NKSSSPSQESNGNNSHQCSSAPEIPRLFFSEWLSSSYPHTDYSSEFTDSKHSQAPNVEETLSAYEEMGDVDQFHYNEMMI NNSNWTLNDIVFGSKCKKQEHHIYREASDCNSSAEFFSPSTTT*
R2R3-MYB	At5g52260	AtMYB19	MTKSGERPKQRQRKGLWSPEEDQKLKSFILSRGHACWTTVPILAGLQRNGKSCRLRWINYLRPGLKRGSFSEEEEETILT LHSSLGNKWSRIAKYLPGRTDNEIKNYWHSYLKKRWLKSQPQLKSQISDLTESPSSLLSCGKRNLETETLDHVISFQKFS ENPTSSPSKESNNNMIMNNSNNLPKLFFSEWISSSNPHIDYSSAFTDSKHINETQDQINEEEVMMINNNNYSSLEDVMLR TDFLQPDHEYANYYSSGDFFINSDQNYV*
R2R3-MYB	At2g47190	AtMYB2	MEDYERINSNSPTHEEDSDVRKGPWTEEEDAILVNFVSIHGDARWNHIARSSGLKRTGKSCRLRWLNYLRPDVRRGNITL EEQFMILKLHSLWGNRWSKIAQYLPGRTDNEIKNYWRTRVQKQAKHLRCDVNSNLFKETMRNVWMPRLVERINAQSLPTT CEQVESMITDPSQPVNEPSPVEPGFVQFSQNHHQQFVPATELSATSSNSPAETFSDVRGGVVNGSGYDPSGQTGFGEFND WGCVGGDNMWTDEESFWFLQDQFCPDTTSYSYN*
R2R3-MYB	At1g66230	AtMYB20	MGRQPCCDKVGLKKGPWTAEEDRKLINFILTNGQCCWRAVPKLSGLLRCGKSCRLRWTNYLRPDLKRGLLSDYEEKMVID LHSQLGNRWSKIASHLPGRTDNEIKNHWNTHIKKKLRKMGIDPLTHKPLSIVEKEDEEPLKKLQNNTVPFQETMERPLEN NIKNISRLEESLGDDQFMEINLEYGVEDVPLIETESLDLICSNSTMSSSTSTSSHSSNDSSFLKDLQFPEFEWSDYGNSN NDNNNGVDNIIENNMMSLWEISDFSSLDLLLNDESSSTFGLF*
R2R3-MYB	At3g27810	AtMYB21	MEKRGGGSSGGSGSSAEAEVRKGPWTMEEDLILINYIANHGDGVWNSLAKSAGLKRTGKSCRLRWLNYLRPDVRRGNITP EEQLIIMELHAKWGNRWSKIAKHLPGRTDNEIKNFWRTRIQKYIKQSDVTTTSSVGSHHSSEINDQAASTSSHNVFCTQD QAMETYSPTPTSYQHTNMEFNYGNYSAAAVTATVDYPVPMTVDDQTGENYWGMDDIWSSMHLLNGN*
R2R3-MYB	At5g40430	AtMYB22	MGEPQLFDVPVLEGIKNTTNEIMNQLEDDKMKKTYENKKEASTSKYLKKSDITKKRWTESEDIKLKEMVALEPKKWTKVA KHFEGRTPKQCRERWHNHARPNVKKTTWSEEEDQILIEVHKVIGAKWIQISEQLPGRSYNNVKNHWNTTKRRVQNKSGRT VNRVGNNILENYIRSITINNDDESDGEPTNIENYHDDSEDMLYGEMNLSPEAITQTTKPLTDASTISPYIPMPKENYTLE VCESLEDYLELLRWWD*
R2R3-MYB	At5g40330	AtMYB23	MRMTRDGKEHEYKKGLWTVEEDKILMDYVRTHGQGHWNRIAKKTGLKRCGKSCRLRWMNYLSPNVNRGNFTDQEEDLIIR LHKLLGNRWSLIAKRVPGRTDNQVKNYWNTHLSKKLGLGDHSTAVKAACGVESPPSMALITTTSSSHQEISGGKNSTLRF DTLVDESKLKPKSKLVHATPTDVEVAATVPNLFDTFWVLEDDFELSSLTMMDFTNGYCL*
R2R3-MYB	At5g40350	AtMYB24	MEKRESSGGSGSGDAEVRKGPWTMEEDLILINYIANHGEGVWNSLAKSAGLKRTGKSCRLRWLNYLRPDVRRGNITPEEQ LTIMELHAKWGNRWSKIAKHLPGRTDNEIKNFWRTKIQKYIIKSGETTTVGSQSSEFINHHATTSHVMNDTQETMDMYSP TTSYQHASNINQQLNYGNYVPESGSIMMPLSVDQSEQNYWSVDDLWPMNIYNGN*
R2R3-MYB	At2g39880	AtMYB25	MNGEISRPPELISSRNPCKSFENAIHKAVEAELAELAKSDANGGGKSKVKGPWLPEQDEALTRLVKMCGPRNWNLISRGI PGRSGKSCRLRWCNQLDPILKRKPFSDEEEHMIMSAQAVLGNKWSVIAKLLPGRTDNAIKNHWNSNLRRKPAEQWKIPLL MSNTEIVYQLYPSMVRRISNASPKEHLPQEEETGVLSDDKMDDEAKEPPREQNSKTGVYRPVARMGAFSVCKPGYMAPCE GPLVQASRPDSLAGKFLQSLCYDPIIPSKCGHGCCNHQDSTTLSSSSVLGSEFVDYEEHSSAELDKELISISNDLNNTAW IRSGKEAEQSLKADDQFRREYAHSKFSGMVNNGVSSQMVRQDLRALS*
R2R3-MYB	At3g13890	AtMYB26	MGHHSCCNKQKVKRGLWSPEEDEKLINYINSYGHGCWSSVPKHAGTYTHIHGFCLQRCGKSCRLRWINYLRPDLKRGSFS PQEAALIIELHSILGNRWAQIAKHLPGRTDNEVKNFWNSSIKKKLMSHHHHGHHHHHLSSMASLLTNLPYHNGFNPTTVD DESSRFMSNIITNTNPNFITPSHLSLPSPHVMTPLMFPTSREGDFKFLTTNNPNQSHHHDNNHYNNLDILSPTPTINNHH QPSLSSCPHDNNLQWPALPDFPASTISGFQETLQDYDDANKLNVFVTPFNDNAKKLLCGEVLEGKVLSSSSPISQDHGLF LPTTYNFQMTSTSDHQHHHRVDSYINHMIIPSSSSSSPISCGQYVIT*
R2R3-MYB	At3g53200	AtMYB27	MDFKKEETLRRGPWLEEEDERLVKVISLLGERRWDSLAIVSGLKRSGKSCRLRWMNYLNPTLKRGPMSQEEERIIFQLHA LWGNKWSKIARRLPGRTDNEIKNYWRTHYRKKQEAQNYGKLFEWRGNTGEELLHKYKETEITRTKTTSQEHGFVEVVSME SGKEANGGVGGRESFGVMKSPYENRISDWISEISTDQSEANLSEDHSSNSCSENNINIGTWWFQETRDFEEFSCSLWS*
R2R3-MYB	At5g61420	AtMYB28	MSRKPCCVGEGLKKGAWTTEEDKKLISYIHDHGEGGWRDIPQKAGLKRCGKSCRLRWTNYLKPEIKRGEFSSEEEQIIIM LHASRGNKWSVIARHLPRRTDNEIKNYWNTHLKKRLMEQGIDPVTHKPLASSSNPTVDENLNSPNASSSDKQYSRSSSMP FLSRPPPSSCNMVSKVSELSSNDGTPIQGSSLSCKKRFKKSSSTSRLLNKVAAKATSIKDILSASMEGSLSATTISHASF FNGFTEQIRNEEDSSNTSLTNTLAEFDPFSPSSLYPEHEINATSDLNMDQDYDFSQFFEKFGGDNHNEENSMNDLLMSDV SQEVSSTSVDDQDNMVGNFEGWSNYLLDHTNFMYDTDSDSLEKHFI*
R2R3-MYB	At5g07690	AtMYB29	MSRKPCCVGEGLKKGAWTAEEDKKLISYIHEHGEGGWRDIPQKAGLKRCGKSCRLRWANYLKPDIKRGEFSYEEEQIIIM LHASRGNKWSVIARHLPKRTDNEIKNYWNTHLKKLLIDKGIDPVTHKPLAYDSNPDEQSQSGSISPKSLPPSSSKNVPEI TSSDETPKYDASLSSKKRCFKRSSSTSKLLNKVAARASSMGTILGASIEGTLISSTPLSSCLNDDFSETSQFQMEEFDPF YQSSEHIIDHMKEDISINNSEYDFSQFLEQFSNNEGEEADNTGGGYNQDLLMSDVSSTSVDEDEMMQNITGWSNYLLDHS DFNYDTSQDYDDKNFI*
R2R3-MYB	At1g22640	AtMYB3	MGRSPCCEKAHMNKGAWTKEEDQLLVDYIRKHGEGCWRSLPRAAGLQRCGKSCRLRWMNYLRPDLKRGNFTEEEDELIIK LHSLLGNKWSLIAGRLPGRTDNEIKNYWNTHIKRKLLSRGIDPNSHRLINESVVSPSSLQNDVVETIHLDFSGPVKPEPV REEIGMVNNCESSGTTSEKDYGNEEDWVLNLELSVGPSYRYESTRKVSVVDSAESTRRWGSELFGAHESDAVCLCCRIGL FRNESCRNCRVSDVRTH*
R2R3-MYB	At3g28910	AtMYB30	MVRPPCCDKGGVKKGPWTPEEDIILVTYIQEHGPGNWRAVPTNTGLLRCSKSCRLRWTNYLRPGIKRGNFTEHEEKMIVH LQALLGNRWAAIASYLPQRTDNDIKNYWNTHLKKKLNKVNQDSHQELDRSSLSSSPSSSSANSNSNISRGQWERRLQTDI HLAKKALSEALSPAVAPIITSTVTTTSSSAESRRSTSSASGFLRTQETSTTYASSTENIAKLLKGWVKNSPKTQNSADQI ASTEVKEVIKSDDGKECAGAFQSFSEFDHSYQQAGVSPDHETKPDITGCCSNQSQWSLFEKWLFEDSGGQIGDILLDENT NFF*
R2R3-MYB	At1g74650	AtMYB31	MGRPPCCEKIEVKKGPWTPEEDIILVSYIQQHGPGNWRSVPANTGLLRCSKSCRLRWTNYLRPGIKRGNFTQPEEKMIIH LQALLGNRWAAIASYLPQRTDNDIKNYWNTHLKKKLVMMKFQNGIINENKTNLATDISSCNNNNNGCNHNKRTTNKGQWE KKLQTDINMAKQALFQALSLDQPSSLIPPDPDSPKPHHHSTTTYASSTDNISKLLQNWTSSSSSKPNTSSVSNNRSSSPG EGGLFDHHSLFSSNSESGSVDEKLNLMSETSMFKGESKPDIDMEATPTTTTTDDQGSLSLIEKWLFDDQGLVQCDDSQED LIDVSLEELK*
R2R3-MYB	At4g34990	AtMYB32	MGRSPCCEKDHTNKGAWTKEEDDKLISYIKAHGEGCWRSLPRSAGLQRCGKSCRLRWINYLRPDLKRGNFTLEEDDLIIK LHSLLGNKWSLIATRLPGRTDNEIKNYWNTHVKRKLLRKGIDPATHRPINETKTSQDSSDSSKTEDPLVKILSFGPQLEK IANFGDERIQKRVEYSVVEERCLDLNLELRISPPWQDKLHDERNLRFGRVKYRCSACRFGFGNGKECSCNNVKCQTEDSS SSSYSSTDISSSIGYDFLGLNNTRVLDFSTLEMK*
R2R3-MYB	At5g06100	AtMYB33	MSYTSTDSDHNESPAADDNGSDCRSRWDGHALKKGPWSSAEDDILIDYVNKHGEGNWNAVQKHTSLFRCGKSCRLRWANH LRPNLKKGAFSQEEEQLIVELHAKMGNRWARMAAHLPGRTDNEIKNYWNTRIKRRQRAGLPLYPPEMHVEALEWSQEYAK SRVMGEDRRHQDFLQLGSCESNVFFDTLNFTDMVPGTFDLADMTAYKNMGNCASSPRYENFMTPTIPSSKRLWESELLYP GCSSTIKQEFSSPEQFRNTSPQTISKTCSFSVPCDVEHPLYGNRHSPVMIPDSHTPTDGIVPYSKPLYGAVKLELPSFQY SETTFDQWKKSSSPPHSDLLDPFDTYIQSPPPPTGGEESDLYSNFDTGLLDMLLLEAKIRNNSTKNNLYRSCAST…
R2R3-MYB	At5g60890	AtMYB34	MVRTPCCKEEGIKKGAWTPEEDQKLIAYLHLHGEGGWRTLPEKAGLKRCGKSCRLRWANYLRPDIKRGEFSPEEDDTIIK LHALKGNKWAAIATSLAGRTDNEIKNYWNTNLKKRLKQKGIDAITHKPINSTGQTGFEPKVNKPVYSSGSARLLNRVASK YAVELNRDLLTGIISGNSTVAEDSQNSGDVDSPTSTLLNKMAATSVLINTTTTYSGFSDNCSFTDEFNEFFNNEEISDIY TTVDNFGFMEELKSILSYGDASAGVIENSPEVNVADAMEFIDSWNEDDNMVGVFV*
R2R3-MYB	At3g28470	AtMYB35	MGRPPCCDKSNVKKGLWTEEEDAKILAYVAIHGVGNWSLIPKKAGLNRCGKSCRLRWTNYLRPDLKHDSFSTQEEELIIE CHRAIGSRWSSIARKLPGRTDNDVKNHWNTKLKKKLMKMGIDPVTHKPVSQLLAEFRNISGHGNASFKTEPSNNSILTQS NSAWEMMRNTTTNHESYYTNSPMMFTNSSEYQTTPFHFYSHPNHLLNGTTSSCSSSSSSTSITQPNQVPQTPVTNFYWSD FLLSDPVPQVVGSSATSDLTFTQNEHHFNIEAEYISQNIDSKASGTCHSASSFVDEILDKDQEMLSQFPQLLNDFDY*
R2R3-MYB	At5g57620	AtMYB36	MGRAPCCDKANVKKGPWSPEEDVKLKDYIDKYGTGGNWIALPQKIGLKRCGKSCRLRWLNYLRPNIKHGGFSEEEDRIIL SLYISIGSRWSIIAAQLPGRTDNDIKNYWNTKLKKKLLGRQKQMNRQDSITDSTENNLSNNNNNKSPQNLSNSALERLQL HMQLQNLQSPFSSFYNNPILWPKLHPLLQSTTTNQNPKLASQESFHPLGVNVDHQHNNTKLAQINNGASSLYSENVEQSQ NPAHEFQPNFGFSQDLRLDNHNMDFMNRGVSKELFQVGNEFELTNGSSWWSEEVELERKTTSSSSWGSASVLDQTTEGMV MLQDYAQMSYHSV*
R2R3-MYB	At5g23000	AtMYB37	MGRAPCCDKTKVKRGPWSPEEDSKLRDYIEKYGNGGNWISFPLKAGLRRCGKSCRLRWLNYLRPNIKHGDFSEEEDRIIF SLFAAIGSRWSIIAAHLPGRTDNDIKNYWNTKLRKKLLSSSSDSSSSAMASPYLNPISQDVKRPTSPTTIPSSSYNPYAE NPNQYPTKSLISSINGFEAGDKQIISYINPNYPQDLYLSDSNNNTSNANGFLLNHNMCDQYKNHTSFSSDVNGIRSEIMM KQEEIMMMMMIDHHIDQRTKGYNGEFTQGYYNYYNGHGDLKQMISGTGTNSNINMGGSGSSSSSISNLAENKSSGSLLLE YKCLPYFYS*
R2R3-MYB	At2g36890	AtMYB38	MGRAPCCDKANVKRGPWSPEEDAKLKDYIEKQGTGGNWIALPHKAGLRRCGKSCRLRWLNYLRPNIRHGDFTEEEDNIIY SLFASIGSRWSVIAAHLQGRTDNDIKNYWNTKLKKKLIATMAPPPHHHLAIATSSSSASPSSSSHYNMINSLLPYNPSTN QLLTPHQGIMMTMMGQQQQLFYQEDMGNLVNSPNRNNLIMSHQEDNQEQSTNKGIMLLSDVRSGSSTTSTVTRVKMEHRD HDDHHHHHEEDERSMTSVVMEDYGMEEIKQLISSSCTSSNNSLWFDENKTEDKFMLYY*
R2R3-MYB	At4g17780	AtMYB39	MGRSPCCDQDKGVKKGPWLPEEDDKLTAYINENGYGNWRSLPKLAGLNRCGKSCRLRWMNYLRPDIRRGKFSDGEESTIV RLHALLGNKWSKIAGHLPGRTDNEIKNYWNTHMRKKLLQMGIDPVTHEPRTNDLSPILDVSQMLAAAINNGQFGNNNLLN NNTALEDILKLQLIHKMLQIITPKAIPNISSFKTNLLNPKPEPVVNSFNTNSVNPKPDPPAGLFINQSGITPEAASDFIP SYENVWDGFEDNQLPGLVTVSQESLNTAKPGTSTTTKVNDHIRTGMMPCYYGDQLLETPSTGSVSVSPETTSLNHPSTAQ HSSGSDFLEDWEKFLDDETSDSCWKSFLDLTSPTSSPVPW*
R2R3-MYB	At4g38620	AtMYB4	MGRSPCCEKAHTNKGAWTKEEDERLVAYIKAHGEGCWRSLPKAAGLLRCGKSCRLRWINYLRPDLKRGNFTEEEDELIIK LHSLLGNKWSLIAGRLPGRTDNEIKNYWNTHIRRKLINRGIDPTSHRPIQESSASQDSKPTQLEPVTSNTINISFTSAPK VETFHESISFPGKSEKISMLTFKEEKDECPVQEKFPDLNLELRISLPDDVDRLQGHGKSTTPRCFKCSLGMINGMECRCG RMRCDVVGGSSKGSDMSNGFDFLGLAKKETTSLLGFRSLEMK*
R2R3-MYB	At5g14340	AtMYB40	MGRKPCCDKIGLKRGPWTIEEDHRLMNFILNNGIHCWRIVPKLAGLLRCGKSCRLRWINYLRPDLKRGGFTDAEEDRIME LHSQLGNRWSKIASHFSGRTDNEIKNHWNTKIKKKMKHLGLDPATHKPMNDITHQTDPNQDKKPNMCSTINEGEEIKDQT PKDDVITETTKTLMLSDNDEELVAKNCKILCAEEVDLESLFETQCNEISSSSFSSLCSNISRSESSSYLAEDSISLEQWD LDMTDPFVPWDLFANLDDNLFLL*
R2R3-MYB	At4g28110	AtMYB41	MGRSPCCDKNGVKKGPWTAEEDQKLIDYIRFHGPGNWRTLPKNAGLHRCGKSCRLRWTNYLRPDIKRGRFSFEEEETIIQ LHSVMGNKWSAIAARLPGRTDNEIKNHWNTHIRKRLVRSGIDPVTHSPRLDLLDLSSLLSALFNQPNFSAVATHASSLLN PDVLRLASLLLPLQNPNPVYPSNLDQNLQTPNTSSESSQPQAETSTVPTNYETSSLEPMNARLDDVGLADVLPPLSESFD LDSLMSTPMSSPRQNSIEAETNSSTFFDFGIPEDFILDDFMF*
R2R3-MYB	At4g12350	AtMYB42	MGRQPCCDKLMVKKGPWTAEEDKKLINFILTNGHCCWRALPKLAGLRRCGKSCRLRWTNYLRPDLKRGLL SDAEEQLVIDLHALLGNRWSKIAARLPGRTDNEIKNHWNTHIKKKLLKMEIDPSTHQPLNKVFTDTNLVD KSETSSKADNVNDNKIVEIDGTTTNTIDDSIITHQNSSNDDYELLGDIIHNYGDLFNILWTNDEPPLVDD ASWSNHNVGIGGTAAVAASDKNNTAAEEDFPERSFEKQNGESWMFLDYCQEFGVEDFGFECYHGFGQSSM KTGHKD
R2R3-MYB	At5g16600	AtMYB43	MGRQPCCDKVGLKKGPWTIEEDKKLINFILTNGHCCWRALPKLSGLLRCGKSCRLRWINYLRPDLKRGLLSEYEEQKVIN LHAQLGNRWSKIASHLPGRTDNEIKNHWNTHIKKKLRKMGIDPLTHKPLSEQEASQQAQGRKKSLVPHDDKNPKQDQQTK DEQEQHQLEQALEKNNTSVSGDGFCIDEVPLLNPHEILIDISSSHHHHSNDDNVNINTSKFTSPSSSSSSTSSCISSVVP GDEFSKFFDEMEILDLKWLSSDDSLGDDISKDGKFNNSTVDTMNLWDINDLSSLDMFMNEHDDGFIGNGNGCSRMVLDQD SWTFDLL*
R2R3-MYB	At5g67300	AtMYB44	MADRIKGPWSPEEDEQLRRLVVKYGPRNWTVISKSIPGRSGKSCRLRWCNQLSPQVEHRPFSAEEDETIARAHAQFGNKW ATIARLLNGRTDNAVKNHWNSTLKRKCGGYDHRGYDGSEDHRPVKRSVSAGSPPVVTGLYMSPGSPTGSDVSDSSTIPIL PSVELFKPVPRPGAVVLPLPIETSSSSDDPPTSLSLSLPGADVSEESNRSHESTNINNTTSSRHNHNNTVSFMPFSGGFR GAIEEMGKSFPGNGGEFMAVVQEMIKAEVRSYMTEMQRNNGGGFVGGFIDNGMIPMSQIGVGRIE*
R2R3-MYB	At3g48920	AtMYB45	MVFKSEKSNREMKSKEKQRKGLWSPEEDEKLRSHVLKYGHGCWSTIPLQAGLQRNGKSCRLRWVNYLRPGLKKSLFTKQE ETILLSLHSMLGNKWSQISKFLPGRTDNEIKNYWHSNLKKGVTLKQHETTKKHQTPLITNSLEALQSSTERSSSSINVGE TSNAQTSSFSPNLVFSEWLDHSLLMDQSPQKSSYVQNLVLPEERGFIGPCGPRYLGNDSLPDFVPNSEFLLDDEISSEIE FCTSFSDNFLFDGLINELRPM*
R2R3-MYB	At5g12870	AtMYB46	MRKPEVAIAASTHQVKKMKKGLWSPEEDSKLMQYMLSNGQGCWSDVAKNAGLQRCGKSCRLRWINYLRPDLKRGAFSPQE EDLIIRFHSILGNRWSQIAARLPGRTDNEIKNFWNSTIKKRLKKMSDTSNLINNSSSSPNTASDSSSNSASSLDIKDIIG SFMSLQEQGFVNPSLTHIQTNNPFPTGNMISHPCNDDFTPYVDGIYGVNAGVQGELYFPPLECEEGDWYNANINNHLDEL NTNGSGNAPEGMRPVEEFWDLDQLMNTEVPSFYFNFKQSI*
R2R3-MYB	At1g18710	AtMYB47	MGRTTWFDVDGMKKGEWTAEEDQKLGAYINEHGVCDWRSLPKRAGLQRCGKSCRLRWLNYLKPGIRRGKFTPQEEEEIIQ LHAVLGNRWAAMAKKMQNRTDNDIKNHWNSCLKKRLSRKGIDPMTHEPIIKHLTVNTTNADCGNSSTTTSPSTTESSPSS GSSRLLNKLAAGISSRQHSLDRIKYILSNSIIESSDQAKEEEEKEEEEEERDSMMGQKIDGSEGEDIQIWGEEEVRRLME IDAMDMYEMTSYDAVMYESSHILDHLF*
R2R3-MYB	At3g46130	AtMYB48	MKMMQEEGNRKGPWTEQEDILLVNFVHLFGDRRWDFIAKVSGLNRTGKSCRLRWVNYLHPGLKRGKMTPQ EERLVLELHAKWGNRWSKIARKLPGRTDNEIKNYWRTHMRKKAQEKKRPVSPTSSFSNCSSSSVTTTTTN TQDTSCHSRKSSGEVSFYDTGGSRSTREMNQENEDVYSLDDIWREIDHSAVNIIKPVKDIYSEQSHCLSY PNLASPSWESSLDSIWNMDADKSKISSYFANDQFPFCFQHSRSPWSSG
R2R3-MYB	At5g54230	AtMYB49	MGKSSSSEESEVKKGPWTPEEDEKLVGYIQTHGPGKWRTLPKNAGLKRCGKSCRLRWTNYLRPDIKRGEFSLQEEETIIQ LHRLLGNKWSAIAIHLPGRTDNEIKNYWNTHIKKKLLRMGIDPVTHCPRINLLQLSSFLTSSLFKSMSQPMNTPFDLTTS NINPDILNHLTASLNNVQTESYQPNQQLQNDLNTDQTTFTGLLNSTPPVQWQNNGEYLGDYHSYTGTGDPSNNKVPQAGN YSSAAFVSDHINDGENFKAGWNFSSSMLAGTSSSSSTPLNSSSTFYVNGGSEDDRESFGSDMLMFHHHHDHNNNALNLS*
R2R3-MYB	At3g13540	AtMYB5	MMSCGGKKPVSKKTTPCCTKMGMKRGPWTVEEDEILVSFIKKEGEGRWRSLPKRAGLLRCGKSCRLRWMNYLRPSVKRGG ITSDEEDLILRLHRLLGNRWSLIAGRIPGRTDNEIKNYWNTHLRKKLLRQGIDPQTHKPLDANNIHKPEEEVSGGQKYPL EPISSSHTDDTTVNGGDGDSKNSINVFGGEHGYEDFGFCYDDKFSSFLNSLINDVGDPFGNIIPISQPLQMDDCKDGIVG ASSSSLGHD*
R2R3-MYB	At1g57560	AtMYB50	MKRHSCCYKQKLRKGLWSPEEDEKLLNYITKHGHGCWSSVPKLAGLERCGKSCRLRWINYLRPDLKRGAFSSEEQNLIVE LHAVLGNRWSQIAARLPGRTDNEIKNLWNSCIKKKLMKKGIDPITHKPLSEVGKETNRSDNNNSTSFSSETNQDLFVKKT SDFAEYSAFQKEESNSVSLRNSLSSMIPTQFNIDDGSVSNAGFDTQVCVKPSIILLPPPNNTSSTVSGQDHVNVSEPNWE SNSGTTSHLNNPGMEEMKWSEEYLNESLFSTQVYVKSETDFNSNIAFPWSQSQACDVFPKDLQRMAFSFGGQTL*
R2R3-MYB	At1g18570	AtMYB51	MVRTPCCKAELGLKKGAWTPEEDQKLLSYLNRHGEGGWRTLPEKAGLKRCGKSCRLRWANYLRPDIKRGEFTEDEERSII SLHALHGNKWSAIARGLPGRTDNEIKNYWNTHIKKRLIKKGIDPVTHKGITSGTDKSENLPEKQNVNLTTSDHDLDNDKA KKNNKNFGLSSASFLNKVANRFGKRINQSVLSEIIGSGGPLASTSHTTNTTTTSVSVDSESVKSTSSSFAPTSNLLCHGT VATTPVSSNFDVDGNVNLTCSSSTFSDSSVNNPLMYCDNFVGNNNVDDEDTIGFSTFLNDEDFMMLEESCVENTAFMKEL TRFLHEDENDVVDVTPVYERQDLFDEIDNYFG*
R2R3-MYB	At1g17950	AtMYB52	MMCSRGHWRPAEDEKLRELVEQFGPHNWNAIAQKLSGRSGKSCRLRWFNQLDPRINRNPFTEEEEERLLASHRIHGNRWS VIARFFPGRTDNAVKNHWHVIMARRGRERSKLRPRGLGHDGTVAATGMIGNYKDCDKERRLATTTAINFPYQFSHINHFQ VLKEFLTGKIGFRNSTTPIQEGAIDQTKRPMEFYNFLQVNTDSKIHELIDNSRKDEEEDVDQNNRIPNENCVPFFDFLSV GNSASQGLC*
R2R3-MYB	At5g65230	AtMYB53	MGRSPSSDETGLKKGPWLPEEDDKLINYIHKHGHSSWSALPKLAGLNRCGKSCRLRWTNYLRPDIKRGKFSAEEEETILN LHAVLGNKWSMIASHLPGRTDNEIKNFWNTHLKKKLIQMGFDPMTHQPRTDDIFSSLSQLMSLSNLRGLVDLQQQFPMED QALLNLQTEMAKLQLFQYLLQPSPAPMSINNINPNILNLLIKENSVTSNIDLGFLSSHLQDFNNNNLPSLKTLDDNHFSQ NTSPIWLHEPPSLNQTMLPTHDPCAQSVDGFGSNQASSSHDQEVAVTDSVDWPDHHLFDDSMFPDISYQS*
R2R3-MYB	At1g73410	AtMYB54	MIMCSRGHWRPAEDEKLKDLVEQYGPHNWNAIALKLPGRSGKSCRLRWFNQLDPRINRNPFTEEEEERLLAAHRIHGNRW SIIARLFPGRTDNAVKNHWHVIMARRTRQTSKPRLLPSTTSSSSLMASEQIMMSSGGYNHNYSSDDRKKIFPADFINFPY KFSHINHLHFLKEFFTGKIALNHKANQSKKPMEFYNFLQVNTDSNKSEIIDQDSGQSKRSDSDTKHESHVPFFDFLSVGN SAS*
R2R3-MYB	At4g01680	AtMYB55	MGRHSCCYKQKLRKGLWSPEEDEKLLRYITKYGHGCWSSVPKQAGLQRCGKSCRLRWINYLRPDLKRGAFSQDEENLIIE LHAVLGNRWSQIAAQLPGRTDNEIKNLWNSCLKKKLRLRGIDPVTHKLLTEIETGTDDKTKPVEKSQQTYLVETDGSSST TTCSTNQNNNTDHLYTGNFGFQRLSLENGSRIAAGSDLGIWIPQTGRNHHHHVDETIPSAVVLPGSMFSSGLTGYRSSNL GLIELENSFSTGPMMTEHQQIQESNYNNSTFFGNGNLNWGLTMEENQNPFTISNHSNSSLYSDIKSETNFFGTEATNVGM WPCNQLQPQQHAYGHI*
R2R3-MYB	At5g17800	AtMYB56	MNPNLLEKDLRGKETTNGSIRYKEANNFRSLPNSHTAACKTSLNNPSISRNHPHNKSASVLESEDEHGNERGENEKSLRM RGKSGINTKVCSRGHWRPTEDAKLKELVAQFGPQNWNLISNHLLGRSGKSCRLRWFNQLDPRINKRAFTEEEEFRLLAAH RAYGNKWALISRLFPGRTDNAVKNHWHVIMARRTRESQRQRQQPPPTLSRDAEMTVSSSCRYNQGKFINEEDDDDDVSAV STCTTELSLTPPSSAYQPRFFNYDSTLASGKDGQCVQRAEVNGIYGKKMDHQNHHTISVSERKVEMKMRSGYYYFDFLGV GAS*
R2R3-MYB	At3g01530	AtMYB57	METTMKKKGRVKATITSQKEEEGTVRKGPWTMEEDFILFNYILNHGEGLWNSVAKASGLKRTGKSCRLRWLNYLRPDVRR GNITEEEQLLIIQLHAKLGNRWSKIAKHLPGRTDNEIKNFWRTKIQRHMKVSSENMMNHQHHCSGNSQSSGMTTQGSSGK AIDTAESFSQAKTTTFNVVEQQSNENYWNVEDLWPVHLLNGDHHVI*
R2R3-MYB	At1g16490	AtMYB58	MGKGRAPCCDKTKVKRGPWSHDEDLKLISFIHKNGHENWRSLPKQAGLLRCGKSCRLRWINYLRPDVKRGNFSAEEEDTI IKLHQSFGNKWSKIASKLPGRTDNEIKNVWHTHLKKRLSSETNLNADEAGSKGSLNEEENSQESSPNASMSFAGSNISSK DDDAQISQMFEHILTYSEFTGMLQEVDKPELLEMPFDLDPDIWSFIDGSDSFQQPENRALQESEEDEVDKWFKHLESELG LEENDNQQQQQQHKQGTEDEHSSSLLESYELLIH*
R2R3-MYB	At5g59780	AtMYB59	MKLVQEEYRKGPWTEQEDILLVNFVHLFGDRRWDFVAKVSGLNRTGKSCRLRWVNYLHPGLKRGKMTPQEERLVLELHAK WGNRWSKIARKLPGRTDNEIKNYWRTHMRKKAQEKKRPMSPTSSSSNCCSSSMTTTTSQDTGGSNGKMNQECEDGYYSMD DIWREIDQSGANVIKPVKDNYYSEQSCYLNFPPLASPTWESSLESIWNMDADESKMSSFAIDQFPLSFEHGSGRL*
R2R3-MYB	At4g09460	AtMYB6	MGRSPCCEKAHTNKGAWTKEEDQRLVDYIRNHGEGCWRSLPKSAGLLRCGKSCRLRWINYLRPDLKRGNFTDDEDQIIIK LHSLLGNKWSLIAGRLPGRTDNEIKNYWNTHIKRKLLSHGIDPQTHRQINESKTVSSQVVVPIQNDAVEYSFSNLAVKPK TENSSDNGASTSGTTTDEDLRQNGECYYSDNSGHIKLNLDLTLGFGSWSGRIVGVGSSADSKPWCDPVMEARLSLL*
R2R3-MYB	At1g08810	AtMYB60	MGRPPCCDKIGIKKGPWTPEEDIILVSYIQEHGPGNWRSVPTNTGLLRCSKSCRLRWTNYLRPGIKRGNFTPHEEGMIIH LQALLGNKWASIASYLPQRTDNDIKNYWNTHLKKKLNKSDSDERSRSENIALQTSSTRNTINHRSTYASSTENISRLLEG WMRASPKSSTSTTFLEHKMQNRTNNFIDHHSDQFPYEQLQGSWEEGHSKGINGDDDQGIKNSENNNGDDVHHEDGDHEDD DDHNATPPLTFIEKWLLEETSTTGGQMEEMSHLMELSNML*
R2R3-MYB	At1g09540	AtMYB61	MGRHSCCYKQKLRKGLWSPEEDEKLLTHITNHGHGCWSSVPKLAGLQRCGKSCRLRWINYLRPDLKRGAFSPEEENLIVE LHAVLGNRWSQIASRLPGRTDNEIKNLWNSSIKKKLKQRGIDPNTHKPISEVESFSDKDKPTTSNNKRSGNDHKSPSSSS ATNQDFFLERPSDLSDYFGFQKLNFNSNLGLSVTTDSSLCSMIPPQFSPGNMVGSVLQTPVCVKPSISLPPDNNSSSPIS GGDHVKLAAPNWEFQTNNNNTSNFFDNGGFSWSIPNSSTSSSQVKPNHNFEEIKWSEYLNTPFFIGSTVQSQTSQPIYIK SETDYLANVSNMTDPWSQNENLGTTETSDVFSKDLQRMAVSFGQSL*
R2R3-MYB	At1g68320	AtMYB62	MENSMKKKKSFKESEDEELRRGPWTLEEDTLLTNYILHNGEGRWNHVAKCAGLKRTGKSCRLRWLNYLKPDIRRGNLTPQ EQLLILELHSKWGNRWSKIAQYLPGRTDNEIKNYWRTRVQKQARQLNIESNSDKFFDAVRSFWVPRLIEKMEQNSSTTTT YCCPQNNNNNSLLLPSQSHDSLSMQKDIDYSGFSNIDGSSSTSTCMSHLTTVPHFMDQSNTNIIDGSMCFHEGNVQEFGG YVPGMEDYMVNSDISMECHVADGYSAYEDVTQDPMWNVDDIWQFRE*
R2R3-MYB	At1g79180	AtMYB63	MGKGRAPCCDKTKVKRGPWSPEEDIKLISFIQKFGHENWRSLPKQSGLLRCGKSCRLRWINYLRPDLKRGNFTSEEEETI IKLHHNYGNKWSKIASQLPGRTDNEIKNVWHTHLKKRLAQSSGTADEPASPCSSDSVSRGKDDKSSHVEDSLNRETNHRN ELSTSMSSGGSNQQDDPKIDELRFEYIEEAYSEFNDIIIQEVDKPDLLEIPFDSDPDIWSFLDTSNSFQQSTANENSSGS RATTEEESDEDEVKKWFKHLESELGLEEDDNQQQYKEEESSSSSLLKNYELMIH*
R2R3-MYB	At5g11050	AtMYB64	MEEQKIQEKSLAHGAAPPLTAVERFLNGQKNEALCFKKQERSIDRPIVKTTRAIEIRNENKENMMFGPRKEKNLAVIGEI VVKGAAKDYTCKDITKKQPYKNIIKGQWTADEDRKLIKLVMQHGERKWAVISEKLEGRAGKQCRERWHNHLRPDIKKDSW SEEEERLLVEAHTRIGNKWAEIAKLIQGRTENSIKNHWNATKRRQNSKRKHKRSKNADSNSDIDDLSPSAKRPRILEDYI KNIENNDKNNGENIMTTSGNNVLSTSNYDQFNSEDSTSSLLDDPYDEELVFLKNIFENHSLENINLSQGTEITQSSSSGF MIENPKPKPNLYNNTFGTHLGAMVTEPANSSHLASDIYLSDLLNGTASSSSSLTFLSSNNNEHAGENELLLPQAN…
R2R3-MYB	At3g11440	AtMYB65	MSYTTATADSDDGMHSSIHNESPAPDSISNGCRSRGKRSVLKKGPWTSTEDGILIDYVKKHGEGNWNAVQKHTSLARCGK SCRLRWANHLRPNLKKGAFSQEEEQLIVEMHAKMGNKWAQMAEHLPGRTDNEIKNYWNTRIKRRQRAGLPLYPPEIYVDD LHWSEEYTKSNIIRVDRRRRHQDFLQLGNSKDNVLFDDLNFAASLLPAASDLSDLVACNMLGTGASSSRYESYMPPILPS PKQIWESGSRFPMCSSNIKHEFQSPEHFQNTAVQKNPRSCSISPCDVDHHPYENQHSSHMMMVPDSHTVTYGMHPTSKPL FGAVKLELPSFQYSETSAFDQWKTTPSPPHSDLLDSVDAYIQSPPPSQVEESDCFSSCDTGLLDMLLHEAKIKTS…
R2R3-MYB	At5g14750	AtMYB66	MRKKVSSSGDEGNNEYKKGLWTVEEDKILMDYVKAHGKGHWNRIAKKTGLKRCGKSCRLRWMNYLSPNVKRGNFTEQEED LIIRLHKLLGNRWSLIAKRVPGRTDNQVKNYWNTHLSKKLGIKDQKTKQSNGDIVYQINLPNPTETSEETKISNIVDNNN ILGDEIQEDHQGSNYLSSLWVHEDEFELSTLTNMMDFIDGHCF*
R2R3-MYB	At3g12720	AtMYB67	MREKWEMKRDEMGHRCCGKHKVKRGLWSPEEDEKLLRYITTHGHPSWSSVPKLAGLQRCGKSCRLRWINYLRPDLRRGSF NEEEEQIIIDVHRILGNKWAQIAKHLPGRTDNEVKNFWNSCIKKKLLSQGLDPSTHNLMPSHKRSSSSNNNNIPKPNKTT SIMKNPTDLDQSTTAFSITNINPPTSTKPNKLKSPNQTTIPSQTVIPINDNMSSTQTMIPINDPMSSLLDDENMIPHWSD VDGMAIHEAPMLPSDKAVVGVDDDDLNMDILFNTPSSSAFDPDFASIFSSAMSIDFNPMDDLGSWTF*
R2R3-MYB	At5g65790	AtMYB68	MGRAPCCDKANVKKGPWSPEEDAKLKDYIENSGTGGNWIALPQKIGLRRCGKSCRLRWLNYLRPNIKHGGFSEEEDNIIC NLYVTIGSRWSIIAAQLPGRTDNDIKNYWNTRLKKKLLNKQRKEFQEARMKQEMVMMKRQQQGQGQGQSNGSTDLYLNNM FGSSPWPLLPQLPPPHHQIPLGMMEPTSCNYYQTTPSCNLEQKPLITLKNMVKIEEEQERTNPDHHHQDSVTNPFDFSFS QLLLDPNYYLGSGGGGEGDFAIMSSSTNSPLPNTSSDQHPSQQQEILQWFGSSNFQTEAINDMFINNNNNIVNLETIENT KVYGDASVAGAAVRAALGGGTTSTSADQSTISWEDITSLVNSEDASYFNAPNHV*
R2R3-MYB	At4g33450	AtMYB69	MEMSRGSNSFDNKKPSCQRGHWRPVEDDNLRQLVEQYGPKNWNFIAQHLYGRSGKSCRLRWYNQLDPNITKKPFTEEEEE RLLKAHRIQGNRWASIARLFPGRTDNAVKNHFHVIMARRKRENFSSTATSTFNQTWHTVLSPSSSLTRLNRSHFGLWRYR KDKSCGLWPYSFVSPPTNGQFGSSSVSNVHHEIYLERRKSKELVDPQNYTFHAATPDHKMTSNEDGPSMGDDGEKNDVTF IDFLGVGLAS*
R2R3-MYB	At2g16720	AtMYB7	MGRSPCCEKEHMNKGAWTKEEDERLVSYIKSHGEGCWRSLPRAAGLLRCGKSCRLRWINYLRPDLKRGNFTHDEDELIIK LHSLLGNKWSLIAARLPGRTDNEIKNYWNTHIKRKLLSKGIDPATHRGINEAKISDLKKTKDQIVKDVSFVTKFEETDKS GDQKQNKYIRNGLVCKEERVVVEEKIGPDLNLELRISPPWQNQREISTCTASRFYMENDMECSSETVKCQTENSSSISYS SIDISSSNVGYDFLGLKTRILDFRSLEMK*
R2R3-MYB	At2g23290	AtMYB70	MSGSTRKEMDRIKGPWSPEEDDLLQSLVQKHGPRNWSLISKSIPGRSGKSCRLRWCNQLSPEVEHRGFTAEEDDTIILAH ARFGNKWATIARLLNGRTDNAIKNHWNSTLKRKCSGGGGGGEEGQSCDFGGNGGYDGNLTDEKPLKRRASGGGGVVVVTA LSPTGSDVSEQSQSSGSVLPVSSSCHVFKPTARAGGVVIESSSPEEEEKDPMTCLRLSLPWVNESTTPPELFPVKREEEE EKEREISGLGGDFMTVVQEMIKTEVRSYMADLQLGNGGGAGGGASSCMVQGTNGRNVGFREFIGLGRIE*
R2R3-MYB	At3g24310	AtMYB71	MSLWGGMGGGWGMVEEGWRKGPWTAEEDRLLIDYVQLHGEGRWNSVARLAGLKRNGKSCRLRWVNYLRPD LKRGQITPHEETIILELHAKWGNRWSTIARSLPGRTDNEIKNYWRTHFKKKTKSPTNSAEKTKNRILKRQ QFQQQRQMELQQEQQLLQFNQIDMKKIMSLLDDDNNNGDNTFSSSSSGESGALYVPHQITHSTTTSGCEP NSNGYYPVVPVTIPEANVNEDNAIWDGLWNLDFEGQGSFGGAACAPRKHYFQNMVIPFC
R2R3-MYB	At1g56160	AtMYB72	MGKGRAPCCDKNKVKRGPWSPQEDLTLITFIQKHGHQNWRSLPKLAGLLRCGKSCRLRWINYLRPDVKRGNFSKKEEDAI IHYHQTLGNKWSKIASFLPGRTDNEIKNVWNTHLKKRLTPSSSSSSLSSTHDQSTKADHDKNCDGAQEEIHSGLNESQNS ATSSHHQGECMHTKPELHEVNGLNEIQFLLDHDDFDDITSEFLQDNDILFPLDSLLHNHQTHISTQEMTREVTKSQSFDH PQPDIPCGFEDTNEESDLRRQLVESTTPNNEYDEWFNFIDNQTYFDDFNFVGEVCL*
R2R3-MYB	At4g37260	AtMYB73	MSNPTRKNMERIKGPWSPEEDDLLQRLVQKHGPRNWSLISKSIPGRSGKSCRLRWCNQLSPEVEHRAFSQEEDETIIRAH ARFGNKWATISRLLNGRTDNAIKNHWNSTLKRKCSVEGQSCDFGGNGGYDGNLGEEQPLKRTASGGGGVSTGLYMSPGSP SGSDVSEQSSGGAHVFKPTVRSEVTASSSGEDPPTYLSLSLPWTDETVRVNEPVQLNQNTVMDGGYTAELFPVRKEEQVE VEEEEAKGISGGFGGEFMTVVQEMIRTEVRSYMADLQRGNVGGSSSGGGGGGSCMPQSVNSRRVGFREFIVNQIGIGKME
R2R3-MYB	At4g05100	AtMYB74	MGRSPCCEKKNGLKKGPWTPEEDQKLIDYINIHGYGNWRTLPKNAGLQRCGKSCRLRWTNYLRPDIKRGR FSFEEEETIIQLHSIMGNKWSAIAARLPGRTDNEIKNYWNTHIRKRLLKMGIDPVTHTPRLDLLDISSIL SSSIYNSSHHHHHHHQQHMNMSRLMMSDGNHQPLVNPEILKLATSLFSNQNHPNNTHENNTVNQTEVNQY QTGYNMPGNEELQSWFPIMDQFTNFQDLMPMKTTVQNSLSYDDDCSKSNFVLEPYYSDFASVLTTPSSSP TPLNSSSSTYINSSTCSTEDEKESYYSDNITNYSFDVNGFLQFQ
R2R3-MYB	At1g56650	AtMYB75	MEGSSKGLRKGAWTTEEDSLLRQCINKYGEGKWHQVPVRAGLNRCRKSCRLRWLNYLKPSIKRGKLSSDEVDLLLRLHRL LGNRWSLIAGRLPGRTANDVKNYWNTHLSKKHEPCCKIKMKKRDITPIPTTPALKNNVYKPRPRSFTVNNDCNHLNAPPK VDVNPPCLGLNINNVCDNSIIYNKDKKKDQLVNNLIDGDNMWLEKFLEESQEVDILVPEATTTEKGDTLAFDVDQLWSLF DGETVKFD*
R2R3-MYB	At5g07700	AtMYB76	MSKRPYCIGEGLKKGAWTTEEDKKLISYIHDHGEGGWRDIPEKAGLKRCGKSCRLRWTNYLKPDIKRGEFSYEEEQIIIM LHASRGNKWSVIARHLPKRTDNEVKNYWNTHLKKRLIDDGIDPVTHKPLASSNPNPVEPMKFDFQKKSNQDEHSSQSSST TPASLPLSSNLNSVKSKISSGETQIESGHVSCKKRFGRSSSTSRLLNKVAARASSIGNILSTSIEGTLRSPASSSGLPDS FSQSYEYMIDNKEDLGTSIDLNIPEYDFPQFLEQLINDDDENENIVGPEQDLLMSDFPSTFVDEDDILGDITSWSTYLLD HPNFMYESDQDSDEKNFL*
R2R3-MYB	At3g50060	AtMYB77	MADRVKGPWSQEEDEQLRRMVEKYGPRNWSAISKSIPGRSGKSCRLRWCNQLSPEVEHRPFSPEEDETIVTARAQFGNKW ATIARLLNGRTDNAVKNHWNSTLKRKCSGGVAVTTVTETEEDQDRPKKRRSVSFDSAFAPVDTGLYMSPESPNGIDVSDS STIPSPSSPVAQLFKPMPISGGFTVVPQPLPVEMSSSSEDPPTSLSLSLPGAENTSSSHNNNNNALMFPRFESQMKINVE ERGEGRRGEFMTVVQEMIKAEVRSYMAEMQKTSGGFVVGGLYESGGNGGFRDCGVITPKVE*
R2R3-MYB	At5g49620	AtMYB78	MGDKGRSLKINKNMEEFTKVEEEMDVRRGPWTVEEDLELINYIASHGEGRWNSLARCAELKRTGKSCRLRWLNYLRPDVR RGNITLEEQLLILELHTRWGNRWSKIAQYLPGRTDNEIKNYWRTRVQKHAKQLKCDVNSQQFKDTMKYLWMPRLVERIQA ASIGSVSMSSCVTTSSDQFVINNNNTNNVDNLALMSNPNGYITPDNSSVAVSPVSDLTECQVSSEVWKIGQDENLVDPKM TSPNYMDNSSGLLNGDFTKMQDQSDLNWFENINGMVPNYSDSFWNIGNDEDFWLLQQHQQVHDNGSF*
R2R3-MYB	At4g13480	AtMYB79	MVEEVWRKGPWTAEEDRLLIEYVRVHGEGRWNSVSKLAGLKRNGKSCRLRWVNYLRPDLKRGQITPHEESIILELHAKWG NRWSTIARSLPGRTDNEIKNYWRTHFKKKAKPTTNNAEKIKSRLLKRQHFKEQREIELQQEQQLFQFDQLGMKKIISLLE ENNSSSSSDGGGDVFYYPDQITHSSKPFGYNSNSLEEQLQGRFSPVNIPDANTMNEDNAIWDGFWNMDVVNGHGGNLGVV AATAACGPRKPYFHNLVIPFC*
R2R3-MYB	At1g35515	AtMYB8	LRWINYLRPDLKRGNFTDGEEQIIVKLHSLFGNKWSLIAGKLPGR
R2R3-MYB	At5g56110	AtMYB80	MGRIPCCEKENVKRGQWTPEEDNKLASYIAQHGTRNWRLIPKNAGLQRCGKSCRLRWTNYLRPDLKHGQF SEAEEHIIVKFHSVLGNRWSLIAAQLPGRTDNDVKNYWNTKLKKKLSGMGIDPVTHKPFSHLMAEITTTL NPPQVSHLAEAALGCFKDEMLHLLTKKRVDLNQINFSNHNPNPNNFHEIADNEAGKIKMDGLDHGNGIMK LWDMGNGFSYGSSSSSFGNEERNDGSASPAVAAWRGHGGIRTAVAETAAAEEEERRKLKGEVVDQEEIGS EGGRGDGMTMMRNHHHHQHVFNVDNVLWDLQADDLINHMV
R2R3-MYB	At2g26960	AtMYB81	MGKVRQDSGSDDDNSIKKSFTKGPWTQAEDNLLIAYVDKHGDGNWNAVQNNSGLSRCGKSCRLRWVNHLRPDLKKGAFTE KEEKRVIELHALLGNKWARMAEELPGRTDNEIKNFWNTRLKRLQRLGLPVYPDEVREHAMNAATHSGLNTDSLDGHHSQE YMEADTVEIPEVDFEHLPLNRSSSYYQSMLRHVPPTNVFVRQKPCFFQPPNVYNLIPPSPYMSTGKRPREPETAFPCPGG YTMNEQSPRLWNYPFVENVSEQLPDSHLLGNAAYSSPPGPLVHGVENFEFPSFQYHEEPGGWGADQPNPMPEHESDNTLV QSPLTAQTPSDCPSSSLYDGLLESVVYGSSGEKPATDTDSESSLFQSFTPANENITGKTCFLTLYALHALHCLCN…
R2R3-MYB	At5g52600	AtMYB82	MECKREEGKSYVKRGLWKPEEDMILKSYVETHGEGNWADISRRSGLKRGGKSCRLRWKNYLRPNIKRGSMSPQEQDLIIR MHKLLGNRWSLIAGRLPGRTDNEVKNYWNTHLNKKPNSRRQNAPESIVGATPFTDKPVMSTELRRSHGEGGEEESNTWME ETNHFGYDVHVGSPLPLISHYPDNTLVFDPCFSFTDFFPLL*
R2R3-MYB	At3g08500	AtMYB83	MMMRKPDITTIRDKGKPNHACGGNNNKPKLRKGLWSPDEDEKLIRYMLTNGQGCWSDIARNAGLLRCGKSCRLRWINYLR PDLKRGSFSPQEEDLIFHLHSILGNRWSQIATRLPGRTDNEIKNFWNSTLKKRLKNNSNNNTSSGSSPNNSNSNSLDPRD QHVDMGGNSTSLMDDYHHDENMMTVGNTMRMDSSSPFNVGPMVNSVGLNQLYDPLMISVPDNGYHQMGNTVNVFSVNGLG DYGNTILDPISKRVSVEGDDWFIPPSENTNVIACSTSNNLNLQALDPCFNSKNLCHSESFKVGNVLGIENGSWEIENPKI GDWDLDGLIDNNSSFPFLDFQVD*
R2R3-MYB	At3g49690	AtMYB84	MGRAPCCDKANVKKGPWSPEEDAKLKSYIENSGTGGNWIALPQKIGLKRCGKSCRLRWLNYLRPNIKHGGFSEEEENIIC SLYLTIGSRWSIIAAQLPGRTDNDIKNYWNTRLKKKLINKQRKELQEACMEQQEMMVMMKRQHQQQQIQTSFMMRQDQTM FTWPLHHHNVQVPALFMNQTNSFCDQEDVKPVLIKNMVKIEDQELEKTNPHHHQDSMTNAFDHLSFSQLLLDPNHNHLGS GEGFSMNSILSANTNSPLLNTSNDNQWFGNFQAETVNLFSGASTSTSADQSTISWEDISSLVYSDSKQFF*
R2R3-MYB	At4g22680	AtMYB85	MGRQPCCDKLGVKKGPWTVEEDKKLINFILTNGHCCWRALPKLAGLRRCGKSCRLRWTNYLRPDLKRGLLSHDEEQLVID LHANLGNKWSKIASRLPGRTDNEIKNHWNTHIKKKLLKMGIDPMTHQPLNQEPSNIDNSKTIPSNPDDVSVEPKTTNTKY VEISVTTTEEESSSTVTDQNSSMDNENHLIDNIYDDDELFSYLWSDETTKDEASWSDSNFGVGGTLYDHNISGADADFPI WSPERINDEKMFLDYCQDFGVHDFGF*
R2R3-MYB	At5g26660	AtMYB86	MGRHSCCFKQKLRKGLWSPEEDEKLLNYITRHGHGCWSSVPKLAGLQRCGKSCRLRWINYLRPDLKRGAF SQDEESLIIELHAALGNRWSQIATRLPGRTDNEIKNFWNSCLKKKLRRKGIDPTTHKPLITNELQSLNVI DQKLTSSEVVKSTGSINNLHDQSMVVSSQQGPWWFPANTTTTNQNSAFCFSSSNTTTVSDQIVSLISSMS TSSSPTPMTSNFSPAPNNWEQLNYCNTVPSQSNSIYSAFFGNQYTEASQTMNNNNPLVDQHHHHQDMKSW ASEILHYTEHNQSSETVIEAEVKPDIANYYWRSASSSSSPNQEAATLLHDANVEVYGKNLQKLNNMVFDQ SL
R2R3-MYB	At4g37780	AtMYB87	MGRAPCCDKMAVKKGPWSTEEDAVLKSYIEKHGTGNNWISLPQRIGIKRCGKSCRLRWLNYLRPNLKHGGFTDEEDYIIC SLYITIGSRWSIIASQLPGRTDNDIKNYWNTRLKKKLLSKQGKAFHQQLNVKFERGTTSSSSSQNQIQIFHDENTKSNQT LYNQVVDPSMRAFAMEEQSMIKNQILEPFSWEPNKVLFDVDYDAAASSYHHHASPSLNSMSSTSSIGTNNSSLQMSHYTV NHNDHDQPDMFFMDGFENFQAELFDEIANNNTVENGFDGTEILINNNYLDHDISSFIDYPLYDNE*
R2R3-MYB	At2g02820	AtMYB88	MEETTKQNNMKKKKKILLHSDDSKKKERHIVTWSPEEDDILRKQISLQGTENWAIIASKFNDKSTRQCRRRWYTYLNSDF KRGGWSPEEDTLLCEAQRLFGNRWTEIAKVVSGRTDNAVKNRFTTLCKKRAKHEAMAKENRIACCVNSDNKRLLFPDGIS TPLKAESESPLTKKMRRSHIPNLTEIKSYGDRSHIKVESTMNQQRRHPFSVVAHNATSSDGTEEQKQIGNVKESDGEDKS NQEVFLKKDDSKVTALMQQAELLSSLAQKVNADNTDQSMENAWKVLQDFLNKSKENDLFRYGIPDIDFQLDEFKDLVEDL RSSNEDSQSSWRQPDLHDSPASSEYSSGSGSGSTIMTHPSGDKTQQLMSDTQTTSHQQNGGELLQDNGIVSDATV…
R2R3-MYB	At5g39700	AtMYB89	MYLFMYKCNIVLEETHVFQNTPCDVSLQRPFNGFGENNALPLRKMHQEEKKKKHRGGHWTLSEDLKLKELVAVFGPQNWK FIGEKMEPRTSLSCRQRWFNQLDPKINKRNFTDEEEEKLLRAHILYGNKWSKIAKLFNRRTDHAVKNHWHSLMNRIIRKQ SASDIRSFDNIQNYQTSNFLPGLCLLNTKQ*
R2R3-MYB	At5g16770	AtMYB9	MGRSPCCDENGLKKGPWTQEEDDKLIDHIQKHGHGSWRALPKQAGLNRCGKSCRLRWTNYLRPDIKRGNFTEEEEQTIIN LHSLLGNKWSSIAGNLPGRTDNEIKNYWNTHLRKKLLQMGIDPVTHRPRTDHLNVLAALPQLIAAANFNSLLNLNQNVQL DATTLAKAQLLHTMIQVLSTNNNTTNPSFSSSTMQNSNTNLFGQASYLENQNLFGQSQNFSHILEDENLMVKTQIIDNPL DSFSSPIQPGFQDDHNSLPLLVPASPEESKETQRMIKNKDIVDYHHHDASNPSSSNSTFTQDHHHPWCDTIDDGASDSFW KEIIEQTCSEPWPFPE*
R2R3-MYB	At1g66390	AtMYB90	MEGSSKGLRKGAWTAEEDSLLRLCIDKYGEGKWHQVPLRAGLNRCRKSCRLRWLNYLKPSIKRGRLSNDEVDLLLRLHKL LGNRWSLIAGRLPGRTANDVKNYWNTHLSKKHESSCCKSKMKKKNIISPPTTPVQKIGVFKPRPRSFSVNNGCSHLNGLP EVDLIPSCLGLKKNNVCENSITCNKDDEKDDFVNNLMNGDNMWLENLLGENQEADAIVPEATTAEHGATLAFDVEQLWSL FDGETVELD*
R2R3-MYB	At2g37630	AtMYB91	MKERQRWSGEEDALLRAYVRQFGPREWHLVSERMNKPLNRDAKSCLERWKNYLKPGIKKGSLTEEEQRLVIRLQEKHGNK WKKIAAEVPGRTAKRLGKWWEVFKEKQQREEKESNKRVEPIDESKYDRILESFAEKLVKERSNVVPAAAAAATVVMANSN GGFLHSEQQVQPPNPVIPPWLATSNNGNNVVARPPSVTLTLSPSTVAAAAPQPPIPWLQQQQPERAENGPGGLVLGSMMP SCSGSSESVFLSELVECCRELEEGHRAWADHKKEAAWRLRRLELQLESEKTCRQREKMEEIEAKMKALREEQKNAMEKIE GEYREQLVGLRRDAEAKDQKLADQWTSRHIRLTKFLEQQMGCRLDRP*
R2R3-MYB	At5g10280	AtMYB92	MGRSPISDDSGLKKGPWTPDEDEKLVNYVQKHGHSSWRALPKLAGLNRCGKSCRLRWTNYLRPDIKRGRFSPDEEQTILN LHSVLGNKWSTIANQLPGRTDNEIKNFWNTHLKKKLIQMGFDPMTHRPRTDIFSGLSQLMSLSSNLRGFVDLQQQFPIDQ EHTILKLQTEMAKLQLFQYLLQPSSMSNNVNPNDFDTLSLLNSIASFKETSNNTTSNNLDLGFLGSYLQDFHSLPSLKTL NSNMEPSSVFPQNLDDNHFKFSTQRENLPVSPIWLSDPSSTTPAHVNDDLIFNQYGIEDVNSNITSSSGQESGASASAAW PDHLLDDSIFSDIP*
R2R3-MYB	At1g34670	AtMYB93	MGRSPCCDENGLKKGPWTPEEDQKLIDYIHKHGHGSWRALPKLADLNRCGKSCRLRWTNYLRPDIKRGKFSAEEEQTILH LHSILGNKWSAIATHLQGRTDNEIKNFWNTHLKKKLIQMGIDPVTHQPRTDLFASLPQLIALANLKDLIEQTSQFSSMQG EAAQLANLQYLQRMFNSSASLTNNNGNNFSPSSILDIDQHHAMNLLNSMVSWNKDQNPAFDPVLELEANDQNQDLFPLGF IIDQPTQPLQQQKYHLNNSPSELPSQGDPLLDHVPFSLQTPLNSEDHFIDNLVKHPTDHEHEHDDNPSSWVLPSLIDNNP KTVTSSLPHNNPADASSSSSYGGCEAASFYWPDICFDESLMNVIS*
R2R3-MYB	At3g47600	AtMYB94	MGRPPCCDKIGVKKGPWTPEEDIILVSYIQEHGPGNWRSVPTHTGLRRCSKSCRLRWTNYLRPGIKRGNFTEHEEKMILH LQALLGNRWAAIASYLPERTDNDIKNYWNTHLKKKLKKMNDSCDSTINNGLDNKDFSISNKNTTSHQSSNSSKGQWERRL QTDINMAKQALCDALSIDKPQNPTNFSIPDLGYGPSSSSSSTTTTTTTTRNTNPYPSGVYASSAENIARLLQNFMKDTPK TSVPLPVAATEMAITTAASSPSTTEGDGEGIDHSLFSFNSIDEAEEKPKLIDHDINGLITQGSLSLFEKWLFDEQSHDMI INNMSLEGQEVLF*
R2R3-MYB	At1g74430	AtMYB95	MGRTTWFDVDGLRKGEWTAEEDRKLVVYINEHGLGEWGSLPKRAGLQRCGKSCRLRWLNYLRPGIKRGKFTPQEEEEIIK YHALLGNRWAAIAKQMPNRTDNDIKNHWNSCLKKRLAKKGIDPMTHEPTTTTSLTVDVTSSSTTSSPTPSPTSSSFSSCS STGSARFLNKLAAGISSRKHGLESIKTVILAEQPREAVDEEKMMTINMKEKELISCYMEIDETMSIDELPCDDSTSGFVA FDDYSLIDPYRDGVYVSDFYDETEHLDLFLL*
R2R3-MYB	At5g62470	AtMYB96	MGRPPCCEKIGVKKGPWTPEEDIILVSYIQEHGPGNWRSVPTHTGLRCSKSCRLRWTNYLRPGIKRGNFTEHEEKTIVHL QALLGNRWAAIASYLPERTDNDIKNYWNTHLKKKLKKINESGEEDNDGVSSSNTSSQKNHQSTNKGQWERRLQTDINMAK QALCEALSLDKPSSTLSSSSSLPTPVITQQNIRNFSSALLDRCYDPSSSSSSTTTTTTSNTTNPYPSGVYASSAENIARL LQDFMKDTPKALTLSSSSPVSETGPLTAAVSEEGGEGFEQSFFSFNSMDETQNLTQETSFFHDQVIKPEITMDQDHGLIS QGSLSLFEKWLFDEQSHEMVGMALAGQEGMF*
R2R3-MYB	At4g26930	AtMYB97	MIVYGGGASEDGEGGGVVLKKGPWTVAEDETLAAYVREYGEGNWNSVQKKTWLARCGKSCRLRWANHLRPNLRKGSFTPE EERLIIQLHSQLGNKWARMAAQLPGRTDNEIKNYWNTRLKRFQRQGLPLYPPEYSQNNHQQQMYPQQPSSPLPSQTPASS FTFPLLQPPSLCPKRCYNTAFSPKASYISSPTNFLVSSPTFLHTHSSLSSYQSTNPVYSMKHELSSNQIPYSASLGVYQV SKFSDNGDCNQNLNTGLHTNTCQLLEDLMEEAEALADSFRAPKRRQIMAALEDNNNNNNFFSGGFGHRVSSNSLCSLQGL TPKEDESLQMNTMQDEDITKLLDWGSESEEISNGQSSVITTENNLVLDDHQFAFLFPVDDDTNNLPGIC*
R2R3-MYB	At4g18770	AtMYB98	MENFVDENGFASLNQNIFTRDQEHMKEEDFPFEVVDQSKPTSFLQDFHHLDHDHQFDHHHHHGSSSSHPLLSVQTTSSCI NNAPFEHCSYQENMVDFYETKPNLMNHHHFQAVENSYFTRNHHHHQEINLVDEHDDPMDLEQNNMMMMRMIPFDYPPTET FKPMNFVMPDEISCVSADNDCYRATSFNKTKPFLTRKLSSSSSSSSWKETKKSTLVKGQWTAEEDRVLIQLVEKYGLRKW SHIAQVLPGRIGKQCRERWHNHLRPDIKKETWSEEEDRVLIEFHKEIGNKWAEIAKRLPGRTENSIKNHWNATKRRQFSK RKCRSKYPRPSLLQDYIKSLNMGALMASSVPARGRRRESNNKKKDVVVAVEEKKKEEEVYGQDRIVPECVFTDDF…
R2R3-MYB	At5g62320	AtMYB99	MGGRKPCCDEVGLRKGPWTVEEDGKLVDFLRARGNCGGGGGGWCWRDVPKLAGLRRCGKSCRLRWTNYLRPDLKRGLFTE EEIQLVIDLHARLGNRWSKIAVELPGRTDNDIKNYWNTHIKRKLIRMGIDPNTHRRFDQQKVNEEETILVNDPKPLSETE VSVALKNDTSAVLSGNLNQLADVDGDDQPWSFLMENDEGGGGDAAGELTMLLSGDITSSCSSSSSLWMKYGEFGYEDLEL GCFDV*
R2R3-MYB		HblMYB1	MGRQPCCDKFGVKKGPWTAEEDRKLVNFILTHGQCCWRAVPKLAGLRRCG KSCRLRWTNYLRPDLKRGLLNEAEEQLVIELHARLGNRWSKIAARLPGRT DNEIKNHWNTHIKKKLIKMGIDPVTHEPLHKQENPGAAAPCHNIMYDHQP NFNGDHQQISNNNCEPQASSSSSNTTPTESSDPNNDDDPLMSYIFSDTYL EDSTWNFPIAREEYCEFGMSSPEGNSPWFLAHNDIGDDYFGLGRFNDVDL SVLDQPDDKH
R1/2-MYB		HblMYB2	MDAKDILGLPKTPLPITQEKKSQPKKDSQRKPDGISREVYALTGGLAPLM PSIDTSQLKRRPPSDEKITWQWLPFTNSARKDNLQLYHWVRVVNGVPPTG DYSFAKYNKSVDIVRYTDEEYEKYLTDPTWTKEETDQLFDLCERFDLRFI IIADRFSLSRTVEELKDRYYSVSRAILLARAPSSGDVSGHPLVKEPYNVS QEIDRKRALSMVLSQTKQQERKDAAVCILLCY
R2/3-MYB		HblMYB3	MKERQRWRAEEDALLRAYVKQYGPKEWNLVSQRMNTTLNRDAKSCLERWK NYLKPGIKKGSLTEEEQRLVIRLQAKHGNKWKKIAAEVPGRTAKRLGKWW EVFKEKQQREQKENNKTVEPIDEGKYDRILETFAEKLVKERPTPAFVMAT SNGGFLHTDPPPAPTLLPPWLSTSNSTSAVRPPSPSVTLSLSPSTVAAPP PSIPWLQPERGQENTAFVLGSLPPHGSVPGENLMVSELMECCRELEEGHR AWAAHKKEAAWRLKRVELQLESEKSCRRREKMEEIESKIKALREEQKASL DRIEAEYREQLAELRRDAETKEQKLAEQWAAKHLRLSKFLEQMVCRPRLA EHNGR
R1/2-MYB		HblMYB4	MVSVNPNPAQGFYFFDPMGMGLTGLNSLRPPMTSTNTTTTDTTIATNTTA VNTSASTTSAAANTVAFADDPSKKIRKPYTITKSRESWTEQEHDKFLEAL QLFDRDWKKIEAFVGSKTVIQIRSHAQKYFLKVQKSGTSEHVPPPRPKRK AAHPYPQKAAKNAAPVVSQVTGPFQSSSASLEPGYVYRSDSSSVLGNSMA GETLTTWSFNSIPPVNVSQVTKDDVGLAHPTIAHNCCYSSSNESTPRAWQ TNEIIDQGDQGKPMRVVPDFAQVYSFIGSVFDPNASGHLQKLKQMDPINL ETVLLLMRNLSINLTSPEFEDHRRLLMSYNIEKAKSVGPYSNFVANKTQN ILSAPREVRG
R2R3-MYB		HblMYB5	MGRSPCCEKAHTNKGAWTKEEDDRLIAYIRAHGEGCWRSLPKAAGLLRCG KSCRLRWINYLRPDLKRGNFTEEEDELIIKLHSLLGNKWSLIAGRLPGRT DNEIKNYWNTHIRRKLLSRGIDPATHRPLNEPAQEAAAKTTTTTISFSHV KEEKDKISCTTTVVCKEGKNPIQERCPDLNLELKISLPYQSQQPEPMKTG ARGLCFACRLGLQNSKDCSCNLGPSIGSSSSSSNSGYDFLAMKSGVLDYR SLEMK
R1/2-MYB		HblMYB6	MDRGIEILSPASYLQNSNWLFPETRATKWTPEENKQFENALALYDKDEPD RWQKVAAVIPGKTVGDVIKQYRELEEDVSDIEAGLIPIPGYSSSDAFTLE WFNNNQGYDGFRHYYTPGGKRTTAARSSEQERKKGVPWTEEEHRQFLMGL QKYGKGDWRNISRNFVTTRTPTQVASHAQKYFIRQSTGGKDKRRSSIHDI TTVNLPDTKSPSPDEKKSSPDHSTTSLQSQPQQKMVGMAKGLIDWKPQNE GGGAAGVFSQANGNLLMAPLCGISSYGQKLQEQNLLRGTLPGYQFAPYNL IFQMQPMQRQ
R2R3-MYB		HblMYB7	MAVTGKDVDRIKGPWSPEEDEALQMLVQKHGPRNWSLISKSIPGRSGKSC RLRWCNQLSPQVEHRAFTPEEDETIIRAHAHFGNKWATIARLLNGRTDNA IKNHWNSTLKRKCSSSMVDDVSFGSRDAYDGNLGGNGQPLKRSVSAGSGM PVSTGLYMNPGSPSGSDVSDSSVPVLSSSHVYRPVPRAAPVFPPVETTSS SNNNDPPTSLSLSLPGADSSEVSNRAAESTPVRVTESTPATNTISLVPAM NQVSLAPAQVEAAAAAVAAGMQQGAVNGGVGGGFVGFTAEFMAVMHEMIK MEVRNYMMEQSRGGGSGGGVGMCRVGGGGGGGGGSGGGVGMCFQAAGGEG FRNVAMNRIGVSKIE
R2R3-MYB		HblMYB8	MMGWGDFPQQGWRKGPWTLEEDKLLSEYVKLHGEGRWSSVARCAGLNRSG KSCRLRWVNYLRPGLKRGQITPQEEGIIIELHALWGNKWSTIARYLPGRT DNEIKNYWRTHFMKREKSSNQKQEKQKAQVLNKKLQLQQEQEQQKQLGVD KTKAIDITNEGKIHEAQEKQEMVCMYPTLGDHCLPVMSQDVASWADFVVD DGLLWGGLWNLDDQVCHTSNCSKIAKQNQATAFSFGGGSNNAYSSTGGYI F
R2R3-MYB		HblMYB9/35	MASTARKDVDRIKGPWSPEEDEALRRLVQNYGPRNWSLISKSIPGRSGKS CRLRWCNQLSPEVEHRPFSPEEDETIIRAHARFGNKWATIARLLNGRTDN AIKNHWNSTLKRKCSSFTDDLSDDADARQPLKRSASVGAGTNISGPVSSL HLNPSSPSGSDVSDSSLPGMSSSPVYRPLLKTGSLVPPVLSIDAASSTTD PPTSLSLSLPGSDSCEASIQVPNSGSGTGFNRGVNPIQDVQTPVAPPTAA GVQQAPAAQRNGVGYERQFFSPEFLAVMQEMIRKEVRNYMSGIEQNGLCL QTEAIRNAVVKRIGISRIE
R2R3-MYB		HblMYB10	MEAMNVCSTSSESSSSESSFNGDSTPRNANKQERIKGPWSAEEDRILTRL VERHGPRNWSLISRYIKGRSGKSCRLRWCNQLSPNVEHRPFSPAEDETIL AAHARYGNRWATIARLLPGRTDNAVKNHWNSTLKRRAREQQHLMMMEGNI DNSNTNEGAVAAAAASGSTPRMAQAVEEEEALTALTLAPPGFGGGGGICS NSSGMEAERRGDRLPAGFWDVMRNVIAREVREYMSSTVNETTWGFH
R2R3-MYB		HblMYB11	MHSMRAPSVTKRMCNSREKESELRRGPWTLEEDTLLTHYIARHGEGRWNM LANYAGLKRTGKSCRLRWLNYLKPDIKRGNLTPQEQLLILELHSKWGNRW SKIAQHLPGRTDNEIKNYWRTRVQRQARQLNIESNSKNFLDAVRCFWMPR LIQKVEQNCCSSPLPTLDSQTQAIASESSPNFTVANSFSSETCPPQNKLA QYSNLASENSSSVTSANVLSTDFLPISHQPEIVENPASSCPPLLDNTVYN NLPLSDSYYVENSGYDMDGFNPAYMPEIDTFGDSTSECKMAEGNWVFDDD MAYTLWNMNDIWQF
R2R3-MYB		HblMYB12	MSSVSSSSLSKKSLSSSSDDDSSDKLRRGPWTLEEDNLLVHYIARHGEGR WNLLAKCAGLRRTGKSCRLRWLNYLKPDVKRGNLTPQEQLLILDLHSKWG NRWSKIAQHLPGRTDNEIKNYWRTRVQKQARHLKVDANSAAFQDIIRCFW IPRLLQKIEGSKTLSLSSSSSRSSFMLSQNPTVSDQPVNYAAPDLPLPPP PPQQLPQEVSGYHQEHLDHNSDSEHTSNSCISSTESMNFSQISQLSEYPN SPFHGMGTFQKDCYYVDIGCNNMETMALATLSVPAGEFQNPLCDPHVAES NWVGCDFGGNIWSMDEFMAI
R2R3-MYB		HblMYB13	MGRSPCCEKAHTNKGAWTKEEDQRLIEYIRIHGEGCWRSLPKAAGLLRCG KSCRLRWINYLRPDLKRGNFTDEEDELIIKFHSLLGNKWSLIAGRLPGRT DNEIKNYWNTHIKRKLISRGIDPQTHGPRNEKTTTISKTTAATGAAKPNA NRVTQLNFENTSPRSIAEINHLKGNIESKYSSNFYSSFNPTKAESTEENN GTSSGMTTDEEHHRHHQQERESSYENQEVNLDLTIALAPSRSELIPRSSS NSAESKLQQQTSYQLLDQTRRVCTCCQLGSQRSELCSKCQNSNGFYRYYY
R2R3-MYB		HblMYB14	MGRSPCCEKAHTNKGAWTKEEDERLIDYIRVHGEGCWRSLPKAAGLLRCG KSCRLRWINYLRPDLKRGNFTDEEDELIIKLHSLLGNKWSVIAGRLPGRT DNEIKNYWNTHVKRKLISRGIDPQTHRPLNEKTTTATTTTTGTTTGAAKP TANRVTQLNFENASPQSISEIKLLKSNIDFKCSKNFNSSFNPRKPESVEE TNCSSSGMTTDEEQHQHHHHQEERKSSHENKEINLELTIGLAPIRSELTP TSSSNLADAESKLQQQAPYQILEKVVTRGVCTCCQLGSQRSELCSNCQNS NGFYRYY
R2R3-MYB		HblMYB15	MEIDLKEKTFVEVDGTNSGDGGGEDGAGSGDDLLLAVGEGGGSGQACRDR VKGPWSPEEDAILSRLVSKFGARNWSLIARGIAGRSGKSCRLRWCNQLDP AVKRKPFTDEEDHIIAAAHAVHGNKWAVIARLLPGRTDNAIKNHWNSTLR RRSTERERLRLASGNVDQDATLDKAKASSEETLSCGDANSFKSFEGKDGS SLDNMNDQCEEKAPLEVPSNNEAKESSTLFRPRARVSAFSVYNPVDGPEI ASPCSRPVPMVGPLIQASIPDDGICKLLDGIYNERLVPQQCGHGCCEAQN GNNPRNSLLGPEFVDFLDPPSFPSFELAAIATDISNLAWLKSGLENNSVR VMGDTAGRIAPYGSQAQMGHL
R2R3-MYB		HblMYB16	MEIDLKEKTFVEVDGTNSGDGGGEDGAGSGDDLLLAVGEGGGSGQACRDR VKGPWSPEEDAILSRLVSKFGARNWSLIARGIAGRSGKSCRLRWCNQLDP AVKRKPFTDEEDHIIAAAHAVHGNKWAVIARLLPGRTDNAIKNHWNSTLR RRSTERERLRLASGNVDQDATLDKAKASSEETLSCGDANSFKSFEGKDGS SLDNMNDQCEEKAPLEVPSNNEAKESSTLFRPRARVSAFSVYNPVDGPEI ASPCSRPVPMVGPLIQASIPDDGICKLLDGIYNERLVPHQCGLGCCEAQN GNNPRNSLLGPEFVDFLDPPSFPSFELAAIATDISNLAWLKSGLENNSVR VMGDTAGRIAPHGSQAQMGHL
R2R3-MYB		HblMYB17	MSHTTNESDDGVLSRDQIEPPLAEEGSSGGSANGGVVLKKGPWTSAEDGI LIEYVKKHGEGNWNAVQKHSGLSRCGKSCRLRWANHLRPNLKKGAFTQEE EQLIIELHAKMGNKWARMAAHLPGRTDNEIKNYWNTRIKRRQRAGLPLYP PEISFQASQERQLGLNVSGINTRDKDHQDLLRTNSYEIPDVIFDSLKANH DISPYVPELPGITASSILVKSLSSSQYGSFMSPTMHRQKRLRESMTLIPG YSGSVKTDSPLFDQFQDNSFDKIAQSFGLCFPFDADPTNKNPQSFGGNRG SHTLANGNFSASKPTSGLVKMELPSLQYPEDGLGSWGTSPPPLLETVDTF IQSPPTGTVESSPRNSGLLDALLHEAKTLSSTKNHSSDKSSN…
R2R3-MYB		HblMYB18	MSHTTNESDDGVLSRDQIEPPLAEEGSSGGSANGGVVLKKGPWTSAEDGI LIEYVKKHGEGNWNAVQKHSGLSRCGKSCRLRWANHLRPNLKKGAFTQEE EQLIIELHAKMGNKWARMAAHLPGRTDNEIKNYWNTRIKRRQRAGLPLYP PEVSLQALQESQRGLNISGINTGDKGHQDLFQTNSYEIPDVIFDSLKANH DISPYVPELPGITASSILVKSLSSSQYGSFMSPTMHRQKRLRESMTLIPG YSGSVKTDSPLFDQFQDNSCDKVAQSFGLSFPFDPDPTNKNAQSFGDNQG SHTFANGNFSASKPTSGLVKMELPSLQYPENDLGSWLTSPPPLLETVDTF IQSPPAGAVESSPRNSGLLDALLHEAKTLSSAKNHSSEKSSN…
R2R3-MYB		HblMYB19	MQEPKTKSNGGNEDSKKKERHIVTWTQQEDDILRQQISLHGTENWAIIAS KFKDKTTRQCRRRWYTYLNSDFKKGGWSPEEDMLLCEAQKIFGNRWTEIA KVVSGRTDNAVKNRFSTLCKKRAKYEALAKENKNASINSNNKRILFHNGF NADGTPENAAPAKKTRRSHIPVHSEHRKLADRSHLQCGNQQSRPPFSVLA QNLHNVNVTGQHHAINTKEVSIDASQNSKIQGTYLRKDDSKITVLMQQAE LLSSLALKINTENTDQSLENAWKVLQDFLNQKENDILRYRFTDIDFQLED FKDFIEDLRSSNDGSRPSWRQPDLYEESPASSEYSTGSTLMPCTAPDKTE QTQVEIGALHEDFPIELQSVHVKEQRDVDECEKESISCANIT…
R2R3-MYB		HblMYB20	MELFPAQPDLSLQISPPNSKPSSTWRRTEEEMGLGFWKRALDSRNTMSSL AKPDACFELSLSNPRVSESNSNHFHLLQNNSNYNGNNVFDYLPQNQYQHQ LQQNHLHHHHPLFQQQQQQQQGLSQELGLLRPIRGIPVYQNPPPFSFSQQ PLDSAGSQTSSLATNNSSSASLRPYQSPGLMRSRLMSRFPAKRSMRAPRM RWTTTLHARFVHAVELLGGHERATPKSVLELMDVKDLTLAHVKSHLQMYR TVKTTDRAAASSGQSDVFDNGSSGDTSEDLMFEIQNSRSELSMQQGKPSG HQDKDYHGLWSNSSREDWLHVKSKDSCGNLPSLKHKDADPNCSIYERISD VSSSTLSGTSPKKPNLEFTLGGPH
R1R2R3-MYB		HblMYB21	MGEVKIEECCLENKQLTAASSSSISEGSGSAILKSPGVSSPATASPTHRR TTGPIRRAKGGWTPEEDETLRNAVAAFKGKSWKKIAEFFPDRSEVQCLHR WQKVLNPDLVKGPWTQEEDDKITVLVAKYGPTKWSVIAKSLPGRIGKQCR ERWHNHLNPDIKKDAWTLEEELELMNAHRKHGNKWAEIAKVLPGRTDNSI KNHWNSSLKKKLDFYLATGKLPPVVKNDIVFSSRKHPSVAKNSIQDGSKD TNKPAVTKTSKESDSTARTSSGTTDACKLEEDGKDQLESVALVRDMAASS SVFPNESADSVGVECKPHSFVADLSCCDSESLRKCENYRINYEISEEKVF GSQLQFETSTYGPLYYEPPLLETCTPIDLNPLVMRQVQHEYS…
R1R2R3-MYB		HblMYB22	MGEVKIEECCLENKQLTAASSSSISEGSGSAILKSPGVSSPATASPTHRR TTGPIRRAKGGWTPEEDETLRNAVAAFKGKSWKKIAEFFPDRSEVQCLHR WQKVLNPDLVKGPWTQEEDDKITVLVAKYGPTKWSVIAKSLPGRIGKQCR ERWHNHLNPDIKKDAWTLEEELELMNAHRKHGNKWAEIAKVLPGRTDNSI KNHWNSSLKKKLDFYLATGKLPPVVKNDIVFSSRKHPSVAKNSIQDGSKD TNKPTVTKTSKESDSTARTSSGTTDACKLEEDDLSCCDSESLRKCENYRI NYEISEEKVFGSQLQFETSTYGPLYYEPPLLETCTPIDLNPLVMRQVQHE YSSSPISSPISFFTPPCVKSSCLSTQSPESILRTAAKSYPNT…
R1R2R3-MYB		HblMYB23	MGEVKIEECCLENKQLTAASSSSISEGSGSAILKSPGVSSPATASPTHRR TTGPIRRAKGGWTPEEDETLRNAVAAFKGKSWKKIAEFFPDRSEVQCLHR WQKVLNPDLVKGPWTQEEDDKIIDLVAKYGPTKWSVIAKSLPGRIGKQCR ERWHNHLNPDIKNGAWTLEEELELMNAHRKHGNKWAEIAKVLSGRTDNSI KNHWNSSLKKKLDFYLATGKLPAVVKSDIVFSPRKLPSVAKTGIRSGSED TNKPTVTKMSKDSDSTAQTLSGTTDACKLEENGKDELESLALVRDMAASS SVFPNESTDSEGVECKQHSFVTYYSCCDSKSLRKCENYGINYEISEEKVI GSQLQFQTSTYGSLYYEPPRLETFTPIDMDPLVMHQVQHEYS…
R1R2R3-MYB		HblMYB24	MESDKSISAPSDGHSEGVQRIRPLHGRTSGPARRSTKGQWTAEEDEILCK AVQRFKGKNWKKIAECFKDRTDVQCLHRWQKVLNPELVKGPWSKEEDEII IEMVNKYGPKKWSTIAHHLPGRIGKQCRERWHNHLNPSINKEAWTQQEEL ALIRAHQIYGNRWAELTKFLPGRTDNAIKNHWNSSVKKKLDSYLASGLLE QFQGLPFVAHKNQPMPSSSSWVQSSGDDTGPKCGTETEEISECSQESIVA GCSQTASGLGNAVLHTREEFQLAEEAGLGKEHSSSPVSCSEQYFMSVADV TFSIPEIPCEVGCPSNFLQQNFSQNPITSASSDYQFDLREFPNISTLELG QESSGLSTHCIAANESHELVNVSFQTSMGNITASSAKPDHIL…
R2R3-MYB		HblMYB25	MGRQPCCEKVGLKVGPWTIEEDQKLMNFILNNGIQCWRLVPKLAGLLRCG KSCRLRWMNYLRPDLKRGALTEAEEDQIIELHSLLGNRWSKIAAHFPGRT DNEIKNQWNTRIKKKLKLLGIDPHTHKPVEKGKDFDTEEGRLQPAEPSKE ELKLHDNSGSIGNLRIENDQVVHRCSSGQDSNLVVQKNLDAAGSVLTPRT DQFESFSSRIDESILQEDSHQQWIDNVEDYLLSWDGFSNLEEIFPLDSHQ
R2R3-MYB		HblMYB26	MKMVQDEIRKGPWTEQEDILLINFVHLFGDRRWDSIAKVSGLNRTGKGCR LRWVNYLHPGLKRGKMTPQEERLVLELHAKWGNRWSRIARKLPGRTDNEI KNYWRTHMRKKAQERKRAMSPSLSSSDSSATSTITTQNSSPSLETGEASF YDTGGPESSPSGGKISKAVQGGEEGYSISMDDIWKDIENTIEPVFDGFSE QGCNFSCPSIASPSWEYCPDTLWTMDEEEGKMFLPYECGTVFLTG
R2R3-MYB		HblMYB27	MDVKGRNSNLKSSSSSSSSTTQSEEEMVGDLRRGPWTVEEDFKLINYIAT HGEGRWNSLARCAGLKRTGKSCRLRWLNYLRPDVRRGNITLEEQLMILEL HSRWGNRWSKIAQHLPGRTDNEIKNYWRTRVQKHAKQLKCDVNSKQFKDT MKYLWMPRLIERIQAANTTATSISTANTAAPTTGVATASTTTDPNHHNHL IINNTDMGNGQWAAVAHGGAGFVANEFGVAQVTPSTYTTPETSSTAASSD SFGTQVSQNDYYSMNPDYFQSGQVGYSELMISPSGYFNQVMDFQAMEQNN HQLWVDGGDPSDNLWNVEEFWFNNM
R2R3-MYB		HblMYB28	MGKITNGGEDNKRSKGHRDSPAIEEASNGPLKKGPWTSAEDAVLVDYVTK HGEGNWNAVQKHSGLSRCGKSCRLRWANHLRPDLKKGAFTPEEERRIIEL HANMGNKWARMAAELPGRTDNEIKNYWNTRIKRLQRAGLPIYPPEVCLKI LNGSQKSQNIGTLQTADTHGPDLTQMDHLEIPEAEFKNLELNQGLLSYSP TVLDIPASSMLKQGVDTSHSNSFMFPTINPNKRLRESQIMFPSLDGSVSS GHSAFIQSTDYFSEKITESFGMSSQYDSHTNTYGQPPLGGLPGSHALLND NSSSSEPSCGAMKLELPSLQYLGTQQDSWGTPTSPLLSLESIDTFIHSPP TEQTQSDFLSPRSSGLLEAVLYESQTLKNSKKCSDTSVACGV…
R2R3-MYB		HblMYB29	MGRTPCCDKRGLKRGPWTPEEDEILVSYIKKNGHGSWRSLPKLAGLLRCG KSCRLRWTNYLRPDIKRGPFTLEEEKLVIQLHGILGNRWAAIASQLPGRT DNEIKNLWNTHLKKRLLCMGLDSQTHEPFTSCGPAIKAPASPATRHMAQW ESARLEAEARLSMESSLFNPPTPGKTDNDYFLRMWNSEVGDSFRKFNRAD KTTCQSPASASQASSSTKCGSVSAVTVDISPNLAGYSTTASNQNEDMECK SCKSHAEDLNAGSDSSSSIELEDSSDSTLQLLLDFPINNDMSFLEGNVDS YATYSVMQL
R2R3-MYB		HblMYB30	MGRHSCCYKQKLRKGLWSPEEDEKLLNYITKHGHGCWSSVPKLAGLQRCG KSCRLRWINYLRPDLKRGAFSQQEENLIIELHGVLGNRWSQIAAQLPGRT DNEIKNLWNSCIKKKLSQRGIDPNTHKPLSEVENDYKEKQSTKNKNNEKA STVSNVNELNLIEPANSKPSTVSSNSKITSNNDHNSNLTPTALTQEFFLD RFATSYESSTTSCRPSDLMGYFPFQKLSYKPTMGLSVNPNTSICFNSNCS SSEIISEFDSCMTPTILPSLSSSMFQTPIRVTPSVSLPSDNPNSVGSCEV SGIQNWEASSFSNNGSSCSNGSSSSIELQNNSTFFETNTFSWEEAHLRSV ENDQAFIKWSEYLSTPFLIGTTAVQNQTSRPMYSEVKPETHF…
R2R3-MYB		HblMYB31	MKERQRWRAEEDALLRAYVKQYGPREWNLVSQRMNTPLNRDAKSCLERWK NYLKPGIKKGSLTEEEQRLVVRLQAKHGNKWKKIAAEVPGRTAKRLGKWW EVFKEKQQREQKENNRTVEPIDEGKYDRILETFAEKLVKERPTPTFVMAT SNGGFLHTDPPAPATTLLPPWLSTSNCASSGRPPSPSVTLSLSPSTVVAP PPIPWLQPERGQDNTAFVIGSLPPHGSVPACENLMISELMECCKELEEGH RALAAHKKEAAWRLRRVELQLESEKSSRRREKMEEIELKIKALGEEQKAS LDRIEAEYREQLAELRRDAETKEQKLAEQWAAKHLRFSKFLEQMVCRPRL AEPNGR
R2R3-MYB		HblMYB32	MVRAPCCEKMGLKKGPWTPEEDKILISHIQKYGHSNWRALPKQAGLLRCG KSCRLRWINYLRPDIKRGNFTEEEEKTIIKLHEMLGNRWSAIAAKLPGRT DNEIKNVWHTHLKKKIKQKQDSNNQQLYVTVPKCDDLSVSNLSESDNSII PALPGLIASPGHSPMSPQPSSSDLSTVTETSGATAETENIKVEKMDSSDM FFPLIDQDLWSEAELAENSSMELASDSMVAAGFYSNFPRIDDDNDMDFWY NLFVKAGDTQELL
R2R3-MYB		HblMYB33	MKMVQDEIRKGPWTEQEDILLINFVHLFGDRRWDSIAKVSGLNRTGKGCR LRWVNYLHPGLKRGKMTPQEERLVLELHAKWGNRWSRIARKLPGRTDNEI KNYWRTHMRKKAQERKRAMSPSLSSSDSSATSTITTQNSSPSLETGEASF YDTGGPESSPSGGKISKAVQGGEEGYSISMDDIWKDIENTIEPVFDGFSE QGCNFSCPSIASPSWEYCPDTLWTMDEEEGKMFLPYECGTVFLTG
R2R3-MYB		HblMYB34	MENKQVKPLIKKGLWKPEEDLILKTYVEAHGEGNWTTVSEKSGLMRGGKS CRLRWKNYLRPNIKRGGMTQEEEDLIIRMHKLLGNRWSLIAGRLPGRTDN EVKNYWNTHLNKRCRTGKRRTADPSNHQNGNDDKYKNKSQRDSQTTCSTS QKSNPEESDGKKEQKEENTVTDTWMQDAQSMNYYIESPMVPPCSDAFLFN EEPFIAHCDSFVLFESFGYNGEEMYIPQLNNSARNGFYLPIPQKHPQDEA VSLKKMVMTHQEKNFNQNHYHLTWPDNWIRALKIKEGSTAVISPVIPKLL SLSVKYK
R2R3-MYB		HblMYB36	MQEMKKKNDGGNADSKKKERHIVTWTQQEDDILRQQISLHGTENWAIIAS KFKDKTTRQCRRRWYTYLNSDFKKGGWSPEEDMLLCEAQKIFGNRWTEIA KVVSGRTDNAVKNRFSTLCKKRAKYEALAKENKNACINSNNKRILFHNGF NADGTPENAAPAKKTRRSHIPVHSEHRKLADRSHLQCGNQQSRPPFSVLA QNLHNVNVTGQHHAINTKEVSIDASQNSKIQGTYLRKDDPKITVLMQQAE LLSSLALKINTENTDQSLENAWKERSFTSIFSTELNLYPGEQRFWRKRAW ARSLELWGPDVLQDFLNQKENDILRYRFTDIDFQLEDFKDFIEDLRSSND GSRPSWRQPDLYEESPASSEYSTGSTLMPCTAPDKTEQTQVE…
R1R2R3-MYB		HblMYB37	MWCPCAQLNMLPKLWNFAEKMLCDKTHLTSSQQHCTTFDSPIFMIHYLQL ANCNIGLSVAECFKDRTDVQCLHRWQKVLNPELVKGPWSKEEDEIIIELV NKYGPKKWSTIAQHLPGRIGKQCRERWHNHLNPSINKEAWTQQEELSLIR AHQIYGNRWAELTKFLPGRTDNAIKNHWNSSVKKKLDSYLASGLLEQFQG LPLVPHQNQPMPSSSSRVQSSGDDPGPKCGIETEEISECSQESIIAGCSQ TASGFGNAVLHTTEEFQLAEESGLGKERSSSPASCSEQYFTSVGDVTFSI PEIPCEVGCSSNFLQQNFSQNTITSASSEYQFNSQELPNISSLELGQESS GLSTHCIAANESHELVNVPFQTSMGNMTAGSAKPDHIFISDD…
R2R3-MYB		HblMYB38	MQEMKKKNDGGNADSKKKERHIVTWTQQEDDILRQQISLHGTENWAIIAS KFKDKTTRQCRRRWYTYLNSDFKKGGWSPEEDMLLCEAQKIFGNRWTEIA KVVSGRTDNAVKNRFSTLCKKRAKYEALAKENKNTYINSNNKRILFHIGF NEDGTPANTAPAKKMRRSHIPDHSEHCKLADRSHLKCGNQQPRPPFAVLA QNFHNVKVDDQHHAINAKEVSIHASQNSKIQGTFLRKDDPKITALMQQAQ LLSSLALKVDTENTDKSLETAWKVLQDFLSQKENDTLRFRFADTDFQPKD FKDLIEDLRSSNDGSRPSWRQSDLYEESQASSEYSTGSTLIPYTAADKTE QTQAEIGALQEDIPNELHSVHIKKQSNVDECEKEIISCANIT…
R2R3-MYB		HblMYB39	MQEMKKKNDGGNADSKKKERHIVTWTQQEDDILRQQISLHGTENWAIIAS KFKDKTTRQCRRRWYTYLNSDFKKGGWSPEEDMLLCEAQKIFGNRWTEIA KVVSGRTDNAVKNRFSTLCKKRAKYEALAKENKNTYINSNNKRILFHIGF NEDGTPANTAPAKKMRRSHIPDHSEHCKLADRSHLKCGNQQPRPPFAVLA QNFHNVKVDDQHHAINAKEVSIHASQNSKIQGTFLRKDDPKITALMQQAQ LLSSLALKVDTENTDKSLETAWKVLQDFLSQKENDTLRFRFADTDFQPKD FKDLIEDLRSSNDGSRPSWRQSDLYEESQASSEYSTGSTLIPYTAADKTE QTQAEIGALQEDIPNELHSVHIKKQSNVDECEKEIISCANIT…
R1R2R3-MYB		HblMYB40	MESDKSISAPSDGHSEGVQRIRPLHGRTSGPARRSTKGQWTAEEDEILCK AVQRFKGKNWKKIAECFKDRTDVQCLHRWQKVLNPELVKGPWSKEEDEII IEMVNKYGPKKWSTIAHHLPGRIGKQCRERWHNHLNPSINKEAWTQQEEL ALIRAHQIYGNRWAELTKFLPGRTDNAIKNHWNSSVKKKLDSYLASGLLE QFQGLPFVAHKNQPMPSSSSWVQSSGDDTGPKCGTETEEISECSQESIVA GCSQTASGLGNAVLHTREEFQLAEEAGLGKEHSSSPVSCSEQYFMSVADV TFSIPEIPCEVGCPSNFLQQNFSQNPITSASSDYQFDLREFPNISTLELG QESSGLSTHCIAANESHELVNVSFQTSMGNITASSAKPDHIL…
R2R3-MYB		HblMYB41	MGNKWARMAAHLPGRTDNEIKNYWNTRIKRRQRAGLPLYPPEISFQASQE RQLGLNVSGINTRDKDHQDLLRTNSYEIPDVIFDSLKANHDISPYVPELP GITASSILVKSLSSSQYGSFMSPTMHRQKRLRESMTLIPGYSGSVKTDSP LFDQFQDNSFDKIAQSFGLCFPFDADPTNKNPQSFGGNRGSHTLANGNFS ASKPTSGLVKMELPSLQYPEDGLGSWGTSPPPLLETVDTFIQSPPTGTVE SSPRNSGLLDALLHEAKTLSSTKNHSSDKSSNSSTVIPGELAESSALNIC ETEWEDLGDPLSPLGQTATSLFTECPPISTCGSSLDEPPATETLTGKHLS YVGLLS
R2R3-MYB		HblMYB42	MSWGFMAGYLGWGGLIEESWRKGPWTAEEDRLLIEYVRLHGEGRWNSVAR LAGLRRNGKSCRLRWVNYLRPDLKRGQITPHEESIILELHARWGNRWSTI ARSLPGRTDNEIKNYWRTHFKKKAKLSPENSEKARNRLLKRQQFQQQQQL QQQQQQQQLLQLNLMDVKKIMSLLDENETQLPYVPQIRQDMTTAYPNTTE EHGLLYNLYNENDSVPEPSSEEFLWDGLWNLDDSHGNFGVPCASSKASMH NLVAPFC
R2R3-MYB		HblMYB43	MSTNNGGSEGGDGDVPAAASHQGGGGVDMHATIHNGGSAKGGGGDGNGET HLKKGPWTAEEDAILVEYVRKHGEGNWNAVQRHSGLARCGKSCRLRWANH LRPNLKKGAFSPEEERLIVELHAKFGNKWARMASLLPGRTDNEIKNYWNT RVKRHQRQGLPLYPPDIQPQHQPSPHFHHHRSSSFTFPTPNTATHTLTPT SATPPPLSPSTTSTSFPTLPLFDFSQPHHHHHHHHHHTSHSTPTTPTSSF SFQTQLPSPTHAHTHNSASSTAPPVSPLSSPSTNVPTNFPTLPLFDFSIP RTPPILQTPIRFKRLSSSPNMATLTTTNNPSSASSISPNSHFSLPLSPLP HASPSNTGPLGHQIPSCFTSSEFHDELQRDNQEMCSLLAALT…
R1/2-MYB		HblMYB44	MVSVNPNPAQGFYFLDPMSMGLPGLNSLPPQMNSTAPTTTTTNTVTTATN TTTASNTSVSTTSAGANTVAFADDPCKKIRKPYTITKSRESWTEQEHDKF LEALQLFDRDWKKIEAFVGSKTVIQIRSHAQKYFLKVQKNGTTEHVPPPR PKRKAAHPYPQKAPKNAPVVTQVTGPFQSSSASLEPGYVYRSDSSSVLGN SMAGETLTTWSFNSIPPVNVSQVTKDDVGLAHPTIAHNCCYSSSNESTPR AWQTNEIIDQGDQGKPMRVVPDFAQVYSFIGSVFDPNASGHLQKLKQMDP INLETILVLLLSFYLAISQVLLLMRNLSINLTSPEFEDHRRLLMSYNIEK AKSVGPYSNFVANKTQNILSAPREVRG
R2R3-MYB	JN038190	HbMYB44	MAVTGKDVDRIKGPWSPEEDEALQKLVQKHGPRNWSLISKSIPGRSGKSCRLRWCNQLSPQVEHRPFTPEEDETIIRAHARLGNKWATIARLLNGRTDNGIK NHWNSTLKRKCSTSMADDGTFGSRDAYDGNLGGNGQPLKRSVSAGSGMPVSTGLYMNPGSPSGSNVSDSSVPVLSSSHVYRPVARAGPVFHPVETTSSSNNNDPPTLLSLSLPGAD SCEVSNRAAESTTVRVADSTPAINTISLMPPVNQVPSPLPAQAAEAAVVGMQQGAANVGAESGFVGFTAEFMAVMQEMIRREVRNYMMEQSGGGSGSGGGVGMCFQAVGGEGFRNV VMNRVGISKIE
